# Supplementary material for: Outer membrane vesicles and the outer membrane protein OmpU govern Vibrio cholerae biofilm matrix assembly
Source: PubMed Central journal article supplement (PMC10865864; doi:10.1128/mbio.03304-23), 2024-01-11
Supplement: mbio.03304-23-s0002.pdf [file mbio.03304-23-s0002.pdf]

**Supplementary Table 1. List of all proteins identified in biofilm matrix proteome**

| Label   | Description                                                            | PsortB         | Total spectral counts |      |      |      |      |
|---------|------------------------------------------------------------------------|----------------|-----------------------|------|------|------|------|
|         |                                                                        |                | M1                    | M2   | M3   | M4   | M5   |
| VCA0865 | Hemagglutinin/proteinase                                               | Extracellular  | 4511                  | 4701 | 5022 | 6031 | 5774 |
| VC0633  | Outer membrane protein U                                               | Outer Membrane | 2310                  | 1980 | 1900 | 1889 | 2057 |
| VCA0812 | Leucine aminopeptidase-related protein                                 | Extracellular  | 1553                  | 1479 | 1885 | 2178 | 1968 |
| VCA0813 | Aminopeptidase                                                         | Extracellular  | 1241                  | 1326 | 1718 | 1964 | 1787 |
| VC1888  | Hemolysin-related protein                                              | Extracellular  | 1055                  | 998  | 1322 | 1282 | 1381 |
| VC1091  | Oligopeptide ABC transporter, periplasmic oligopeptide-binding protein | Periplasmic    | 915                   | 841  | 918  | 1133 | 1079 |
| VCA0223 | Pre-pro-metalloprotease PrtV                                           | Extracellular  | 807                   | 796  | 1007 | 991  | 978  |
| VC1362  | Amino acid ABC transporter, periplasmic amino acid-binding protein     | Periplasmic    | 648                   | 718  | 926  | 936  | 1143 |
| VC0930  | Hemolysin-related protein                                              | Extracellular  | 615                   | 569  | 737  | 719  | 807  |
| VC2187  | Flagellin C                                                            | Extracellular  | 492                   | 422  | 457  | 505  | 555  |
| VC2143  | Flagellin D                                                            | Extracellular  | 445                   | 396  | 364  | 472  | 563  |
| VC0157  | Alkaline serine protease                                               | Extracellular  | 425                   | 421  | 446  | 496  | 412  |
| VC2142  | Flagellin B                                                            | Extracellular  | 372                   | 361  | 398  | 432  | 550  |
| VC0171  | Peptide ABC transporter, periplasmic peptide-binding protein           | Periplasmic    | 397                   | 420  | 368  | 417  | 434  |
| VCA0883 | Non-hemolytic enterotoxin lytic component L1                           | Extracellular  | 250                   | 221  | 251  | 325  | 400  |
| VC1952  | Chitinase                                                              | Extracellular  | 219                   | 211  | 330  | 315  | 358  |
| VCA0738 | Conjugal transfer protein TraF                                         | Unknown        | 332                   | 285  | 234  | 192  | 246  |
| VC1929  | C4-dicarboxylate-binding periplasmic protein DctP                      | Periplasmic    | 196                   | 156  | 300  | 276  | 329  |
| VC2738  | Phosphoenolpyruvate carboxykinase (ATP)                                | Cytoplasmic    | 226                   | 203  | 229  | 253  | 302  |
| VC0608  | Iron(III) ABC transporter, periplasmic iron-compound-binding protein   | Periplasmic    | 198                   | 187  | 253  | 227  | 269  |
| VC0430  | Immunogenic protein                                                    | Unknown        | 196                   | 157  | 201  | 223  | 264  |
| VC2188  | Flagellin A                                                            | Extracellular  | 163                   | 166  | 175  | 210  | 240  |
| VCA0027 | Chitinase                                                              | Unknown        | 93                    | 170  | 201  | 207  | 213  |
| VC0409  | MSHA pilin protein MshA                                                | Unknown        | 154                   | 133  | 126  | 123  | 130  |
| VCA0539 | UPF0312 protein VC_A0539                                               | Unknown        | 69                    | 61   | 160  | 145  | 221  |
| VC1425  | Putrescine-binding periplasmic protein                                 | Periplasmic    | 120                   | 112  | 128  | 115  | 155  |
| VC2000  | Glyceraldehyde-3-phosphate dehydrogenase                               | Cytoplasmic    | 81                    | 105  | 146  | 139  | 150  |
| VC2412  | Dihydrolipoyl dehydrogenase                                            | Cytoplasmic    | 121                   | 113  | 129  | 107  | 118  |
| VC1141  | Isocitrate dehydrogenase [NADP]                                        | Cytoplasmic    | 108                   | 96   | 106  | 109  | 143  |
| VC2562  | 2',3'-cyclic-nucleotide 2'-phosphodiesterase                           | Periplasmic    | 100                   | 108  | 113  | 97   | 117  |
| VC1485  | DUF3466 family protein                                                 | Unknown        | 107                   | 115  | 96   | 102  | 95   |
| VCA0881 | Uncharacterized protein                                                | Unknown        | 83                    | 75   | 108  | 109  | 135  |
| VC1325  | Autoinducer 2-binding periplasmic protein LuxP                         | Periplasmic    | 106                   | 80   | 88   | 73   | 141  |
| VC0034  | Thiol:disulfide interchange protein DsbA                               | Periplasmic    | 92                    | 88   | 107  | 91   | 107  |
| VC2618  | Acetylornithine aminotransferase                                       | Cytoplasmic    | 85                    | 98   | 84   | 96   | 106  |
| VCA1028 | Maltoporin                                                             | Outer Membrane | 151                   | 106  | 66   | 58   | 45   |
| VC0336  | 2,3-bisphosphoglycerate-independent phosphoglycerate mutase            | Cytoplasmic    | 81                    | 80   | 67   | 80   | 96   |
| VC0475  | Iron-regulated outer membrane virulence protein                        | Outer Membrane | 75                    | 79   | 79   | 79   | 89   |
| VC1863  | Amino acid ABC transporter, periplasmic amino acid-binding protein     | Periplasmic    | 45                    | 47   | 98   | 83   | 125  |
| VCA0981 | Solute-binding protein family 3/N-terminal domain-containing protein   | Unknown        | 70                    | 56   | 96   | 75   | 98   |
| VC1334  | Tricarboxylic transport TctC                                           | Periplasmic    | 65                    | 60   | 72   | 67   | 88   |

|         |                                                                      |                |    |    |    |    |     |
|---------|----------------------------------------------------------------------|----------------|----|----|----|----|-----|
| VCA0685 | Iron(III) ABC transporter, periplasmic iron-compound-binding protein | Periplasmic    | 59 | 54 | 72 | 56 | 109 |
| VCA0576 | Heme transport protein HutA                                          | Outer Membrane | 90 | 67 | 56 | 47 | 76  |
| VC1560  | Catalase-peroxidase                                                  | Cytoplasmic    | 62 | 77 | 58 | 64 | 71  |
| VCA1113 | Putrescine-binding periplasmic protein                               | Periplasmic    | 58 | 54 | 62 | 68 | 70  |
| VC1523  | PBP domain-containing protein                                        | Unknown        | 66 | 58 | 51 | 59 | 77  |
| VC1854  | Porin, putative                                                      | Outer Membrane | 95 | 60 | 50 | 47 | 48  |
| VC2670  | Triosephosphate isomerase                                            | Cytoplasmic    | 51 | 44 | 61 | 59 | 84  |
| VC2211  | Vibriobactin receptor                                                | Outer Membrane | 97 | 42 | 46 | 53 | 58  |
| VC0194  | Glutathione hydrolase proenzyme                                      | Periplasmic    | 67 | 73 | 43 | 60 | 47  |
| VCA0945 | Maltodextrin-binding protein                                         | Periplasmic    | 49 | 47 | 54 | 50 | 86  |
| VC2045  | Superoxide dismutase                                                 | Periplasmic    | 32 | 39 | 71 | 64 | 78  |
| VC0354  | Peptidyl-prolyl cis-trans isomerase                                  | Periplasmic    | 55 | 58 | 57 | 56 | 56  |
| VC0432  | Malate dehydrogenase                                                 | Unknown        | 46 | 41 | 55 | 55 | 81  |
| VCA0645 | VOC domain-containing protein                                        | Unknown        | 39 | 47 | 49 | 56 | 84  |
| VC1414  | Metal-dependent carboxypeptidase                                     | Cytoplasmic    | 35 | 52 | 46 | 60 | 81  |
| VC2197  | Flagellar hook protein FlgE                                          | Extracellular  | 70 | 57 | 39 | 54 | 47  |
| VC2350  | Deoxyribose-phosphate aldolase                                       | Cytoplasmic    | 40 | 63 | 50 | 53 | 59  |
| VC0478  | Fructose-bisphosphate aldolase                                       | Cytoplasmic    | 44 | 43 | 61 | 50 | 61  |
| VC2615  | DUF1338 domain-containing protein                                    | Cytoplasmic    | 42 | 45 | 42 | 49 | 77  |
| VCA0759 | Arginine ABC transporter, periplasmic arginine-binding protein       | Periplasmic    | 50 | 48 | 51 | 43 | 51  |
| VC1424  | Putrescine-binding periplasmic protein                               | Periplasmic    | 50 | 43 | 48 | 53 | 49  |
| VCA0900 | Metallo-beta-lactamase domain-containing protein                     | Unknown        | 44 | 47 | 41 | 51 | 56  |
| VC0928  | RbmA protein                                                         | Unknown        | 60 | 41 | 40 | 38 | 60  |
| VC2213  | Outer membrane protein OmpA                                          | Outer Membrane | 79 | 24 | 31 | 28 | 73  |
| VC1894  | Penicillin-binding protein activator LpoB                            | Unknown        | 67 | 33 | 45 | 29 | 59  |
| VCA1041 | Phosphomannomutase, putative                                         | Unknown        | 42 | 40 | 36 | 40 | 68  |
| VCA1039 | Amino acid ABC transporter, periplasmic amino acid-binding protein   | Periplasmic    | 40 | 46 | 45 | 44 | 51  |
| VCA0227 | Iron(III) ABC transporter, periplasmic iron-compound-binding protein | Periplasmic    | 52 | 44 | 44 | 38 | 46  |
| VCA0884 | Non-hemolytic enterotoxin lytic component L1                         | Inner Membrane | 35 | 38 | 44 | 45 | 56  |
| VC2279  | Aminoacyl-histidine dipeptidase                                      | Cytoplasmic    | 25 | 28 | 52 | 46 | 64  |
| VC2694  | Superoxide dismutase                                                 | Periplasmic    | 22 | 21 | 38 | 46 | 71  |
| VC1950  | trimethylamine-N-oxide reductase                                     | Periplasmic    | 33 | 32 | 46 | 40 | 43  |
| VCA0882 | Uncharacterized protein                                              | Inner Membrane | 22 | 29 | 46 | 37 | 56  |
| VC1663  | Heat shock protein HslJ                                              | Unknown        | 62 | 20 | 34 | 35 | 37  |
| VC2174  | 5'-nucleotidase                                                      | Periplasmic    | 37 | 35 | 35 | 38 | 42  |
| VC1621  | Agglutination protein                                                | Outer Membrane | 44 | 38 | 27 | 36 | 40  |
| VC1154  | Uncharacterized protein                                              | Unknown        | 77 | 35 | 18 | 24 | 30  |
| VC0968  | Cysteine synthase                                                    | Cytoplasmic    | 44 | 46 | 28 | 34 | 31  |
| VC1318  | Outer membrane protein OmpV                                          | Outer Membrane | 69 | 59 | 18 | 11 | 23  |
| VCA0863 | Lysophospholipase VolA                                               | Unknown        | 39 | 45 | 24 | 32 | 38  |
| VC2095  | Phosphoglucomutase                                                   | Cytoplasmic    | 34 | 41 | 30 | 33 | 31  |
| VCA0623 | Transaldolase                                                        | Cytoplasmic    | 28 | 30 | 27 | 30 | 49  |
| VCA0877 | Hydrolase, putative                                                  | Unknown        | 27 | 41 | 27 | 31 | 38  |
| VC2144  | Flagellin E                                                          | Extracellular  | 34 | 31 | 26 | 34 | 30  |
| VC2550  | YtfJ family protein                                                  | Inner Membrane | 30 | 29 | 27 | 31 | 37  |

|                |                                                                                     |                |    |    |    |    |    |
|----------------|-------------------------------------------------------------------------------------|----------------|----|----|----|----|----|
| <b>VCA0140</b> | Spindolin-related protein                                                           | Unknown        | 33 | 27 | 30 | 32 | 27 |
| <b>VC0298</b>  | Acetyl-coenzyme A synthetase                                                        | Cytoplasmic    | 23 | 32 | 27 | 23 | 41 |
| <b>VC0244</b>  | Perosamine synthase                                                                 | Cytoplasmic    | 31 | 28 | 23 | 30 | 33 |
| <b>VC0374</b>  | Glucose-6-phosphate isomerase                                                       | Cytoplasmic    | 22 | 30 | 23 | 26 | 32 |
| <b>VCA0925</b> | Dihydroorotase                                                                      | Cytoplasmic    | 23 | 28 | 26 | 25 | 30 |
| <b>VC0028</b>  | Dihydroxy-acid dehydratase                                                          | Cytoplasmic    | 22 | 31 | 26 | 27 | 23 |
| <b>VC0604</b>  | Aconitate hydratase B                                                               | Cytoplasmic    | 27 | 23 | 22 | 21 | 36 |
| <b>VC0964</b>  | PTS system, glucose-specific IIA component                                          | Cytoplasmic    | 33 | 22 | 18 | 20 | 33 |
| <b>VC2036</b>  | Aspartate-semialdehyde dehydrogenase 1                                              | Cytoplasmic    | 24 | 19 | 23 | 29 | 27 |
| <b>VC0620</b>  | Peptide ABC transporter, periplasmic peptide-binding protein                        | Periplasmic    | 23 | 22 | 21 | 23 | 31 |
| <b>VCA0849</b> | RTX toxin                                                                           | Extracellular  | 24 | 26 | 21 | 25 | 23 |
| <b>VC1384</b>  | Outer membrane protein beta-barrel domain-containing protein                        | Unknown        | 23 | 14 | 24 | 25 | 30 |
| <b>VCA1033</b> | Extracellular solute-binding protein, putative                                      | Periplasmic    | 29 | 30 | 19 | 19 | 17 |
| <b>VCA0513</b> | Amino acid biosynthesis aminotransferase                                            | Cytoplasmic    | 28 | 24 | 21 | 17 | 24 |
| <b>VC1346</b>  | Fumarylacetoacetate hydrolase family protein                                        | Unknown        | 24 | 19 | 17 | 24 | 30 |
| <b>VC1836</b>  | Tol-Pal system protein TolB                                                         | Periplasmic    | 28 | 17 | 23 | 19 | 24 |
| <b>VC2230</b>  | Phosphoheptose isomerase                                                            | Cytoplasmic    | 21 | 21 | 22 | 19 | 25 |
| <b>VCA0867</b> | Outer membrane protein W                                                            | Outer Membrane | 36 | 42 | 11 | 12 | 5  |
| <b>VC1034</b>  | Uridine phosphorylase                                                               | Cytoplasmic    | 19 | 20 | 19 | 24 | 22 |
| <b>VCA0978</b> | Amino acid ABC transporter, periplasmic amino acid-binding protein, putative        | Periplasmic    | 15 | 17 | 22 | 22 | 22 |
| <b>VCA0197</b> | GMP reductase                                                                       | Cytoplasmic    | 26 | 22 | 16 | 18 | 14 |
| <b>VC0581</b>  | Penicillin-binding protein activator LpoA                                           | Inner Membrane | 33 | 11 | 5  | 12 | 30 |
| <b>VCA0568</b> | Conjugal transfer protein TraF                                                      | Outer Membrane | 27 | 16 | 10 | 10 | 25 |
| <b>VC1293</b>  | Aminotransferase                                                                    | Cytoplasmic    | 20 | 20 | 13 | 12 | 21 |
| <b>VC0736</b>  | Isocitrate lyase                                                                    | Cytoplasmic    | 20 | 17 | 15 | 15 | 19 |
| <b>VCA0702</b> | Iron-containing alcohol dehydrogenase                                               | Cytoplasmic    | 11 | 13 | 19 | 15 | 27 |
| <b>VC0156</b>  | Vitamin B12 transporter BtuB                                                        | Outer Membrane | 22 | 13 | 17 | 14 | 17 |
| <b>VC1983</b>  | Peptidase, putative                                                                 | Cytoplasmic    | 17 | 14 | 14 | 19 | 19 |
| <b>VC2542</b>  | UDP-N-acetylmuramate--L-alanyl-gamma-D-glutamyl-meso-2,6-diaminoheptandioate ligase | Cytoplasmic    | 13 | 10 | 21 | 15 | 20 |
| <b>VCA0975</b> | endopeptidase La                                                                    | Cytoplasmic    | 18 | 18 | 9  | 14 | 19 |
| <b>VC1010</b>  | Probable lactoylglutathione lyase                                                   | Cytoplasmic    | 12 | 4  | 19 | 24 | 17 |
| <b>VC2002</b>  | DUF2860 domain-containing protein                                                   | Outer Membrane | 15 | 12 | 17 | 15 | 16 |
| <b>VC2290</b>  | Na(+)-translocating NADH-quinone reductase subunit F                                | Cytoplasmic    | 11 | 16 | 19 | 16 | 11 |
| <b>VCA0037</b> | Copper chaperone PCu(A)C                                                            | Unknown        | 18 | 9  | 9  | 18 | 19 |
| <b>VCA0886</b> | 2-amino-3-ketobutyrate coenzyme A ligase                                            | Cytoplasmic    | 15 | 10 | 12 | 15 | 19 |
| <b>VC1895</b>  | DUF1425 domain-containing protein                                                   | Unknown        | 19 | 16 | 7  | 10 | 19 |
| <b>VC2347</b>  | Purine nucleoside phosphorylase DeoD-type 1                                         | Cytoplasmic    | 14 | 7  | 15 | 14 | 19 |
| <b>VC0755</b>  | Peptidase B                                                                         | Cytoplasmic    | 9  | 20 | 13 | 15 | 12 |
| <b>VC2168</b>  | DUF2066 domain-containing protein                                                   | Unknown        | 10 | 9  | 15 | 15 | 20 |
| <b>VC2190</b>  | Flagellar hook-associated protein FlgL                                              | Extracellular  | 24 | 13 | 10 | 8  | 13 |
| <b>VC2157</b>  | 4-hydroxy-tetrahydrodipicolinate synthase                                           | Cytoplasmic    | 11 | 13 | 15 | 11 | 17 |
| <b>VC2305</b>  | Outer membrane protein OmpK                                                         | Outer Membrane | 9  | 10 | 15 | 13 | 18 |
| <b>VC1048</b>  | Putative NAD(P)H nitroreductase                                                     | Unknown        | 13 | 10 | 10 | 6  | 26 |
| <b>VC0734</b>  | Malate synthase                                                                     | Cytoplasmic    | 8  | 14 | 11 | 16 | 16 |
| <b>VCA0130</b> | Autoinducer 2-binding periplasmic protein LuxP                                      | Periplasmic    | 13 | 11 | 10 | 16 | 14 |
| <b>VC2299</b>  | Peptidyl-prolyl cis-trans isomerase                                                 | Periplasmic    | 12 | 9  | 15 | 14 | 14 |

|                |                                                                                      |                |    |    |    |    |    |
|----------------|--------------------------------------------------------------------------------------|----------------|----|----|----|----|----|
| <b>VC0446</b>  | LPS-assembly protein LptD                                                            | Outer Membrane | 15 | 14 | 11 | 10 | 13 |
| <b>VC2447</b>  | Enolase                                                                              | Cytoplasmic    | 11 | 8  | 14 | 12 | 15 |
| <b>VC2099</b>  | Flavodoxin                                                                           | Cytoplasmic    | 14 | 11 | 6  | 11 | 18 |
| <b>VC2501</b>  | Cytosol aminopeptidase                                                               | Cytoplasmic    | 12 | 11 | 11 | 12 | 13 |
| <b>VCA0328</b> | Biphenyl-2,3-diol 1,2-dioxygenase III-related protein                                | Cytoplasmic    | 8  | 7  | 15 | 12 | 16 |
| <b>VCA0591</b> | Peptide ABC transporter, periplasmic peptide-binding protein, putative               | Periplasmic    | 15 | 10 | 11 | 10 | 12 |
| <b>VC2436</b>  | Outer membrane protein TolC                                                          | Outer Membrane | 20 | 8  | 7  | 9  | 13 |
| <b>VC1494</b>  | Aminopeptidase N                                                                     | Cytoplasmic    | 12 | 12 | 11 | 9  | 12 |
| <b>VC0483</b>  | Oxidative stress defense protein                                                     | Periplasmic    | 11 | 14 | 7  | 13 | 11 |
| <b>VCA0144</b> | Immunogenic protein                                                                  | Unknown        | 5  | 6  | 11 | 12 | 21 |
| <b>VCA0811</b> | GlcNAc-binding protein A                                                             | Extracellular  | 10 | 13 | 9  | 13 | 9  |
| <b>VCA0690</b> | Acetyl-CoA acetyltransferase                                                         | Cytoplasmic    | 12 | 11 | 6  | 12 | 13 |
| <b>VC0362</b>  | Elongation factor Tu-B                                                               | Cytoplasmic    | 14 | 5  | 14 | 12 | 8  |
| <b>VC2191</b>  | Flagellar hook-associated protein 1                                                  | Extracellular  | 18 | 8  | 6  | 6  | 15 |
| <b>VC0372</b>  | Alanine racemase                                                                     | Cytoplasmic    | 13 | 7  | 10 | 8  | 14 |
| <b>VC0776</b>  | Ferric vibriobactin ABC transporter, periplasmic ferric vibriobactin-binding protein | Periplasmic    | 11 | 9  | 12 | 9  | 10 |
| <b>VC2252</b>  | Outer membrane protein assembly factor BamA                                          | Outer Membrane | 13 | 9  | 9  | 8  | 12 |
| <b>VC1866</b>  | Formate acetyltransferase                                                            | Cytoplasmic    | 8  | 13 | 8  | 11 | 11 |
| <b>VC1064</b>  | Lipoprotein-related protein                                                          | Unknown        | 13 | 9  | 6  | 12 | 10 |
| <b>VC0538</b>  | Thiosulfate ABC transporter, periplasmic thiosulfate-binding protein                 | Periplasmic    | 6  | 6  | 9  | 6  | 21 |
| <b>VC0186</b>  | Glutathione reductase                                                                | Cytoplasmic    | 7  | 10 | 9  | 9  | 13 |
| <b>VCA0678</b> | Periplasmic nitrate reductase                                                        | Periplasmic    | 18 | 12 | 8  | 5  | 4  |
| <b>VCA0207</b> | NH(3)-dependent NAD(+) synthetase                                                    | Cytoplasmic    | 6  | 8  | 9  | 11 | 13 |
| <b>VC1101</b>  | Uncharacterized protein                                                              | Unknown        | 11 | 6  | 8  | 5  | 17 |
| <b>VC1933</b>  | Oxidored_molyb domain-containing protein                                             | Inner Membrane | 5  | 7  | 7  | 13 | 14 |
| <b>VC0667</b>  | Oxidoreductase Tas, aldo/keto reductase family                                       | Cytoplasmic    | 9  | 6  | 7  | 10 | 13 |
| <b>VCA0624</b> | Transketolase 2                                                                      | Cytoplasmic    | 8  | 7  | 10 | 9  | 10 |
| <b>VC0414</b>  | DUF6701 domain-containing protein                                                    | Unknown        | 8  | 9  | 11 | 11 | 5  |
| <b>VC2616</b>  | N-succinylglutamate 5-semialdehyde dehydrogenase                                     | Cytoplasmic    | 6  | 11 | 6  | 8  | 12 |
| <b>VC0972</b>  | Porin, putative                                                                      | Outer Membrane | 7  | 6  | 8  | 6  | 16 |
| <b>VC2261</b>  | Methionine aminopeptidase                                                            | Cytoplasmic    | 7  | 3  | 8  | 10 | 14 |
| <b>VC1779</b>  | Sialic acid-binding periplasmic protein SiaP                                         | Periplasmic    | 7  | 5  | 9  | 7  | 13 |
| <b>VC1098</b>  | Acetate kinase 1                                                                     | Cytoplasmic    | 6  | 9  | 13 | 5  | 8  |
| <b>VC0756</b>  | Nucleoside diphosphate kinase                                                        | Cytoplasmic    | 10 | 6  | 9  | 7  | 9  |
| <b>VCA0828</b> | Phenylalanine-4-hydroxylase                                                          | Cytoplasmic    | 6  | 6  | 9  | 10 | 9  |
| <b>VCA0136</b> | Glycerophosphoryl diester phosphodiesterase                                          | Periplasmic    | 5  | 4  | 7  | 10 | 14 |
| <b>VC1554</b>  | Glycerophosphoryl diester phosphodiesterase, putative                                | Cytoplasmic    | 9  | 10 | 7  | 6  | 8  |
| <b>VC0772</b>  | Vibriobactin-specific 2,3-dihydroxybenzoate-AMP ligase                               | Cytoplasmic    | 4  | 5  | 9  | 6  | 14 |
| <b>VCA0625</b> | TonB receptor-related protein                                                        | Outer Membrane | 10 | 7  | 9  | 7  | 5  |
| <b>VC0905</b>  | Probable D-methionine-binding lipoprotein MetQ                                       | Inner Membrane | 7  | 6  | 6  | 9  | 9  |
| <b>VC0762</b>  | Outer membrane protein assembly factor BamB                                          | Outer Membrane | 5  | 4  | 12 | 8  | 8  |
| <b>VC1255</b>  | ribonucleoside-diphosphate reductase                                                 | Cytoplasmic    | 3  | 5  | 8  | 8  | 13 |
| <b>VC1195</b>  | Lipoprotein, putative                                                                | Outer Membrane | 8  | 9  | 5  | 7  | 8  |
| <b>VCA0829</b> | Acetyl-CoA synthase                                                                  | Cytoplasmic    | 7  | 7  | 4  | 10 | 8  |
| <b>VC0306</b>  | Thioredoxin                                                                          | Cytoplasmic    | 8  | 6  | 7  | 7  | 8  |
| <b>VC0188</b>  | oligopeptidase A                                                                     | Cytoplasmic    | 4  | 9  | 6  | 8  | 8  |

|                |                                                                       |                |    |    |   |    |    |
|----------------|-----------------------------------------------------------------------|----------------|----|----|---|----|----|
| <b>VC0477</b>  | Phosphoglycerate kinase                                               | Cytoplasmic    | 6  | 0  | 3 | 6  | 19 |
| <b>VC0120</b>  | Porphobilinogen deaminase                                             | Cytoplasmic    | 5  | 3  | 8 | 9  | 9  |
| <b>VC1184</b>  | NifS-related protein                                                  | Cytoplasmic    | 10 | 6  | 4 | 4  | 10 |
| <b>VC0537</b>  | Cysteine synthase                                                     | Cytoplasmic    | 10 | 6  | 4 | 6  | 7  |
| <b>VC2210</b>  | Vibriobactin utilization protein ViuB                                 | Cytoplasmic    | 4  | 7  | 6 | 4  | 11 |
| <b>VC2491</b>  | 3-isopropylmalate dehydrogenase                                       | Cytoplasmic    | 10 | 5  | 4 | 6  | 7  |
| <b>VC1344</b>  | 4-hydroxyphenylpyruvate dioxygenase                                   | Cytoplasmic    | 6  | 3  | 8 | 10 | 5  |
| <b>VC0058</b>  | Carbonic anhydrase, family 3                                          | Cytoplasmic    | 6  | 7  | 7 | 6  | 6  |
| <b>VC1704</b>  | 5-methyltetrahydropteroyltriglutamate--homocysteine methyltransferase | Cytoplasmic    | 7  | 7  | 3 | 5  | 9  |
| <b>VC0132</b>  | Uncharacterized protein                                               | Unknown        | 9  | 3  | 4 | 6  | 9  |
| <b>VC2298</b>  | Lipoprotein, putative                                                 | Unknown        | 6  | 2  | 8 | 5  | 9  |
| <b>VC0275</b>  | Phosphoribosylamine--glycine ligase                                   | Cytoplasmic    | 7  | 4  | 6 | 5  | 7  |
| <b>VCA0897</b> | 6-phosphogluconolactonase                                             | Unknown        | 6  | 4  | 6 | 5  | 8  |
| <b>VCA0862</b> | Long-chain fatty acid transport protein                               | Outer Membrane | 9  | 8  | 2 | 4  | 6  |
| <b>VCA0838</b> | OsmC/Ohr family protein                                               | Unknown        | 4  | 4  | 4 | 8  | 9  |
| <b>VCA0018</b> | Type VI secretion system spike protein VgrG2                          | Cytoplasmic    | 4  | 7  | 8 | 5  | 4  |
| <b>VC1942</b>  | Bifunctional protein FofD                                             | Cytoplasmic    | 4  | 5  | 6 | 6  | 7  |
| <b>VCA0219</b> | Hemolysin                                                             | Extracellular  | 6  | 6  | 5 | 7  | 3  |
| <b>VC2268</b>  | 6,7-dimethyl-8-ribityllumazine synthase                               | Cytoplasmic    | 6  | 2  | 5 | 9  | 5  |
| <b>VC0013</b>  | Beta sliding clamp                                                    | Cytoplasmic    | 4  | 7  | 5 | 5  | 6  |
| <b>VCA0700</b> | Chitodextrinase                                                       | Periplasmic    | 5  | 7  | 5 | 6  | 4  |
| <b>VC2535</b>  | PmbA protein                                                          | Unknown        | 4  | 5  | 6 | 8  | 4  |
| <b>VC2480</b>  | Ribose-5-phosphate isomerase A                                        | Cytoplasmic    | 9  | 6  | 1 | 5  | 5  |
| <b>VC1182</b>  | Thioredoxin reductase                                                 | Unknown        | 6  | 6  | 8 | 3  | 3  |
| <b>VC2539</b>  | Thiamine-binding periplasmic protein                                  | Periplasmic    | 7  | 10 | 2 | 4  | 3  |
| <b>VC2270</b>  | Riboflavin synthase, alpha subunit                                    | Cytoplasmic    | 7  | 4  | 4 | 5  | 6  |
| <b>VC1416</b>  | Actin cross-linking toxin VgrG1                                       | Cytoplasmic    | 3  | 6  | 4 | 7  | 5  |
| <b>VCA0691</b> | Acetoacetyl-CoA reductase                                             | Cytoplasmic    | 7  | 8  | 5 | 3  | 2  |
| <b>VC0935</b>  | Capsular polysaccharide synthesis enzyme CpsB                         | Outer Membrane | 6  | 3  | 5 | 6  | 5  |
| <b>VC0573</b>  | Ubiquinol-cytochrome c reductase iron-sulfur subunit                  | Inner Membrane | 4  | 5  | 6 | 4  | 6  |
| <b>VC1532</b>  | N-acetyl-D-glucosamine kinase                                         | Cytoplasmic    | 1  | 4  | 9 | 4  | 6  |
| <b>VC0332</b>  | Uroporphyrinogen decarboxylase                                        | Cytoplasmic    | 6  | 7  | 4 | 4  | 3  |
| <b>VC2669</b>  | 5-carboxymethyl-2-hydroxymuconate delta isomerase, putative           | Cytoplasmic    | 5  | 4  | 6 | 3  | 6  |
| <b>VC2111</b>  | NADPH-dependent FMN reductase-like domain-containing protein          | Unknown        | 5  | 6  | 6 | 4  | 3  |
| <b>VC0675</b>  | Thymidylate synthase                                                  | Cytoplasmic    | 6  | 3  | 7 | 3  | 4  |
| <b>VC1134</b>  | Histidinol-phosphate aminotransferase                                 | Cytoplasmic    | 4  | 5  | 5 | 2  | 7  |
| <b>VC2145</b>  | TyrA protein                                                          | Cytoplasmic    | 4  | 2  | 3 | 3  | 11 |
| <b>VC1664</b>  | ABC transporter, periplasmic substrate-binding protein, putative      | Periplasmic    | 8  | 6  | 1 | 4  | 4  |
| <b>VC1200</b>  | Trypsin, putative                                                     | Unknown        | 5  | 5  | 4 | 5  | 4  |
| <b>VC0146</b>  | Ribosomal RNA small subunit methyltransferase D                       | Cytoplasmic    | 9  | 7  | 1 | 2  | 4  |
| <b>VCA0885</b> | L-threonine 3-dehydrogenase                                           | Cytoplasmic    | 6  | 3  | 5 | 3  | 5  |
| <b>VC2379</b>  | 5'-methylthioadenosine/S-adenosylhomocysteine nucleosidase            | Cytoplasmic    | 4  | 2  | 3 | 4  | 9  |
| <b>VC1203</b>  | Urocanate hydratase                                                   | Cytoplasmic    | 5  | 5  | 2 | 4  | 6  |
| <b>VCA1077</b> | NirV                                                                  | Unknown        | 5  | 4  | 2 | 5  | 6  |
| <b>VCA0935</b> | Uncharacterized protein                                               | Unknown        | 6  | 7  | 1 | 3  | 5  |

|                |                                                                      |                |   |   |   |   |   |
|----------------|----------------------------------------------------------------------|----------------|---|---|---|---|---|
| <b>VC1492</b>  | glutamate dehydrogenase                                              | Cytoplasmic    | 5 | 3 | 8 | 5 | 1 |
| <b>VC1483</b>  | 3-hydroxydecanoyl-[acyl-carrier-protein] dehydratase                 | Cytoplasmic    | 5 | 7 | 1 | 3 | 5 |
| <b>VCA0610</b> | Glyoxalase                                                           | Cytoplasmic    | 3 | 4 | 5 | 5 | 4 |
| <b>VC0576</b>  | Stringent starvation protein A                                       | Cytoplasmic    | 5 | 6 | 3 | 3 | 4 |
| <b>VC1730</b>  | DNA topoisomerase 1                                                  | Cytoplasmic    | 6 | 2 | 2 | 2 | 8 |
| <b>VC0556</b>  | Glutamate--cysteine ligase                                           | Cytoplasmic    | 3 | 2 | 4 | 3 | 8 |
| <b>VC1819</b>  | Aldehyde dehydrogenase                                               | Cytoplasmic    | 7 | 3 | 3 | 5 | 2 |
| <b>VC0067</b>  | Aminopeptidase P                                                     | Cytoplasmic    | 3 | 3 | 4 | 4 | 6 |
| <b>VCA0337</b> | Putative carboxypeptidase VC_A0337                                   | Cytoplasmic    | 5 | 2 | 2 | 3 | 7 |
| <b>VC1702</b>  | YCII-related domain-containing protein                               | Unknown        | 5 | 3 | 2 | 3 | 6 |
| <b>VC1622</b>  | Outer membrane protein, putative                                     | Outer Membrane | 3 | 3 | 4 | 5 | 4 |
| <b>VC1299</b>  | 6-carboxy-5,6,7,8-tetrahydropterin synthase                          | Cytoplasmic    | 4 | 3 | 5 | 4 | 3 |
| <b>VCA0711</b> | Methylglyoxal synthase                                               | Cytoplasmic    | 3 | 2 | 6 | 5 | 2 |
| <b>VC1834</b>  | Cell division coordinator CpoB                                       | Unknown        | 4 | 3 | 4 | 2 | 5 |
| <b>VC1183</b>  | Agglutination protein                                                | Cytoplasmic    | 5 | 1 | 4 | 2 | 6 |
| <b>VC2645</b>  | Acetylornithine deacetylase                                          | Cytoplasmic    | 3 | 1 | 3 | 4 | 6 |
| <b>VC0361</b>  | Elongation factor G 1                                                | Cytoplasmic    | 4 | 4 | 2 | 2 | 5 |
| <b>VCA0734</b> | OMP_b-brl domain-containing protein                                  | Unknown        | 4 | 0 | 3 | 4 | 6 |
| <b>VC1835</b>  | Peptidoglycan-associated lipoprotein                                 | Outer Membrane | 4 | 2 | 4 | 3 | 4 |
| <b>VC1672</b>  | DNA-3-methyladenine glycosidase I                                    | Unknown        | 2 | 6 | 3 | 3 | 3 |
| <b>VC1603</b>  | Solute-binding protein family 3/N-terminal domain-containing protein | Unknown        | 4 | 3 | 3 | 3 | 4 |
| <b>VC1583</b>  | Superoxide dismutase [Cu-Zn]                                         | Periplasmic    | 4 | 2 | 3 | 3 | 5 |
| <b>VC0973</b>  | VvgS protein                                                         | Unknown        | 6 | 3 | 4 | 2 | 2 |
| <b>VC0566</b>  | Periplasmic serine endoprotease DegP-like                            | Periplasmic    | 5 | 3 | 1 | 4 | 4 |
| <b>VC0488</b>  | Extracytoplasmic solute receptor protein                             | Unknown        | 5 | 4 | 5 | 2 | 1 |
| <b>VC0139</b>  | DPS family protein                                                   | Cytoplasmic    | 4 | 2 | 2 | 5 | 4 |
| <b>VC0029</b>  | Branched-chain-amino-acid aminotransferase                           | Cytoplasmic    | 2 | 3 | 5 | 3 | 4 |
| <b>VC2764</b>  | ATP synthase subunit beta                                            | Cytoplasmic    | 8 | 2 | 2 | 3 | 1 |
| <b>VC1732</b>  | 3-phosphoshikimate 1-carboxyvinyltransferase                         | Cytoplasmic    | 3 | 1 | 2 | 4 | 6 |
| <b>VC0341</b>  | Oligoribonuclease                                                    | Cytoplasmic    | 9 | 2 | 1 | 1 | 3 |
| <b>VC2432</b>  | Esterase YqiA                                                        | Cytoplasmic    | 2 | 1 | 3 | 5 | 5 |
| <b>VC2514</b>  | UDP-N-acetylglucosamine 1-carboxyvinyltransferase                    | Cytoplasmic    | 6 | 2 | 2 | 3 | 2 |
| <b>VCA1056</b> | Methyl-accepting chemotaxis protein                                  | Inner Membrane | 5 | 2 | 2 | 1 | 5 |
| <b>VC1350</b>  | Glutathione-dependent peroxiredoxin                                  | Unknown        | 7 | 3 | 1 | 1 | 3 |
| <b>VC0578</b>  | Hemolysin, putative                                                  | Periplasmic    | 4 | 5 | 1 | 2 | 3 |
| <b>VC0174</b>  | SPOR domain-containing protein                                       | Periplasmic    | 3 | 4 | 1 | 4 | 3 |
| <b>VC1133</b>  | Histidinol dehydrogenase                                             | Cytoplasmic    | 2 | 8 | 1 | 3 | 0 |
| <b>VC2251</b>  | Chaperone protein Skp                                                | Periplasmic    | 5 | 1 | 1 | 2 | 5 |
| <b>VC1312</b>  | Broad specificity amino-acid racemase                                | Unknown        | 3 | 4 | 4 | 0 | 3 |
| <b>VC2198</b>  | Basal-body rod modification protein FlgD                             | Extracellular  | 3 | 5 | 1 | 1 | 4 |
| <b>VC1872</b>  | PrkA AAA domain-containing protein                                   | Cytoplasmic    | 3 | 1 | 4 | 5 | 1 |
| <b>VC0731</b>  | Alkyl hydroperoxide reductase C                                      | Cytoplasmic    | 4 | 1 | 3 | 5 | 1 |
| <b>VC1202</b>  | Histidine ammonia-lyase                                              | Cytoplasmic    | 2 | 1 | 3 | 3 | 4 |
| <b>VC0708</b>  | Outer membrane protein assembly factor BamD                          | Outer Membrane | 3 | 2 | 2 | 3 | 3 |
| <b>VC0055</b>  | Oxygen-dependent coproporphyrinogen-III oxidase                      | Cytoplasmic    | 3 | 1 | 2 | 3 | 4 |
| <b>VCA0859</b> | Oxidoreductase, aldo/keto reductase 2 family                         | Cytoplasmic    | 1 | 4 | 2 | 3 | 3 |
| <b>VCA0593</b> | Exopolyphosphatase-related protein                                   | Cytoplasmic    | 2 | 1 | 1 | 2 | 7 |

|                |                                                               |                |   |   |   |   |   |
|----------------|---------------------------------------------------------------|----------------|---|---|---|---|---|
| <b>VC2416</b>  | 2',3'-cyclic-nucleotide 2'-phosphodiesterase, putative        | Periplasmic    | 3 | 3 | 1 | 2 | 4 |
| <b>VC2059</b>  | Purine-binding chemotaxis protein CheW                        | Cytoplasmic    | 1 | 2 | 5 | 4 | 1 |
| <b>VC1849</b>  | Peptidyl-prolyl cis-trans isomerase                           | Cytoplasmic    | 2 | 2 | 3 | 1 | 5 |
| <b>VC1709</b>  | Zinc protease, insulinase family                              | Unknown        | 2 | 3 | 3 | 3 | 2 |
| <b>VCA0894</b> | Probable phosphatase VC_A0894                                 | Cytoplasmic    | 2 | 3 | 2 | 3 | 2 |
| <b>VC2366</b>  | Putative 4-hydroxy-4-methyl-2-oxoglutarate aldolase           | Cytoplasmic    | 1 | 3 | 3 | 2 | 3 |
| <b>VC2621</b>  | Extracellular nuclease-related protein                        | Unknown        | 2 | 1 | 4 | 2 | 3 |
| <b>VC2517</b>  | Phospholipid-binding protein MlaC                             | Unknown        | 1 | 3 | 0 | 2 | 6 |
| <b>VC2433</b>  | 3',5'-cyclic adenosine monophosphate phosphodiesterase CpdA   | Cytoplasmic    | 2 | 2 | 4 | 2 | 2 |
| <b>VC2766</b>  | ATP synthase subunit alpha                                    | Cytoplasmic    | 2 | 1 | 5 | 3 | 0 |
| <b>VCA0432</b> | VOC domain-containing protein                                 | Unknown        | 0 | 0 | 2 | 3 | 6 |
| <b>VC1887</b>  | Peptidoglycan-binding protein CsiV                            | Unknown        | 3 | 0 | 2 | 3 | 3 |
| <b>VC1042</b>  | Long-chain fatty acid transport protein                       | Outer Membrane | 3 | 1 | 3 | 2 | 2 |
| <b>VC0767</b>  | Inosine-5'-monophosphate dehydrogenase                        | Cytoplasmic    | 1 | 1 | 2 | 4 | 3 |
| <b>VC0758</b>  | HTH cro/C1-type domain-containing protein                     | Unknown        | 2 | 2 | 3 | 1 | 3 |
| <b>VC0422</b>  | TldD protein                                                  | Cytoplasmic    | 2 | 3 | 4 | 1 | 1 |
| <b>VC0381</b>  | Uncharacterized protein                                       | Unknown        | 5 | 1 | 1 | 2 | 2 |
| <b>VC0168</b>  | Cytochrome c5                                                 | Periplasmic    | 0 | 1 | 3 | 2 | 5 |
| <b>VC0476</b>  | D-erythrose-4-phosphate dehydrogenase                         | Cytoplasmic    | 1 | 2 | 3 | 2 | 2 |
| <b>VC2141</b>  | Protein FlaG                                                  | Unknown        | 2 | 4 | 1 | 2 | 1 |
| <b>VCA0053</b> | Purine nucleoside phosphorylase DeoD-type 2                   | Cytoplasmic    | 0 | 3 | 2 | 3 | 2 |
| <b>VCA0026</b> | UPF0319 protein VC_A0026                                      | Unknown        | 3 | 0 | 0 | 1 | 6 |
| <b>VC1623</b>  | Carboxynorspermidine/carboxyspermidine decarboxylase          | Cytoplasmic    | 2 | 2 | 0 | 4 | 2 |
| <b>VC0435</b>  | 50S ribosomal protein L21                                     | Cytoplasmic    | 0 | 0 | 5 | 4 | 1 |
| <b>VC0327</b>  | 50S ribosomal protein L7/L12                                  | Unknown        | 5 | 1 | 1 | 1 | 2 |
| <b>VCA0765</b> | L-allo-threonine aldolase                                     | Cytoplasmic    | 1 | 2 | 3 | 2 | 2 |
| <b>VCA0644</b> | NADH oxidase, putative                                        | Unknown        | 2 | 3 | 2 | 1 | 2 |
| <b>VC2524</b>  | 3-deoxy-D-manno-octulosonate 8-phosphate phosphatase KdsC     | Cytoplasmic    | 1 | 5 | 0 | 1 | 3 |
| <b>VC2422</b>  | nicotinate-nucleotide diphosphorylase (carboxylating)         | Cytoplasmic    | 2 | 1 | 2 | 2 | 3 |
| <b>VC1059</b>  | Oxidoreductase, short-chain dehydrogenase/reductase family    | Cytoplasmic    | 2 | 0 | 0 | 4 | 4 |
| <b>VC1049</b>  | Transcriptional regulator, LysR family                        | Cytoplasmic    | 1 | 2 | 2 | 3 | 2 |
| <b>VC0715</b>  | NADPH-flavin oxidoreductase                                   | Inner Membrane | 2 | 0 | 2 | 2 | 4 |
| <b>VC0710</b>  | Purine nucleoside phosphorylase                               | Unknown        | 1 | 2 | 3 | 2 | 2 |
| <b>VC0502</b>  | Type IV pilin, putative                                       | Unknown        | 2 | 0 | 3 | 3 | 2 |
| <b>VC0408</b>  | MSHA pilin protein MshB                                       | Unknown        | 1 | 0 | 2 | 3 | 4 |
| <b>VC2664</b>  | Chaperonin GroEL 1                                            | Cytoplasmic    | 2 | 1 | 3 | 2 | 1 |
| <b>VC2359</b>  | Uracil-DNA glycosylase                                        | Cytoplasmic    | 2 | 1 | 2 | 1 | 3 |
| <b>VC2019</b>  | 3-oxoacyl-[acyl-carrier-protein] synthase 2                   | Cytoplasmic    | 4 | 0 | 1 | 1 | 3 |
| <b>VC0752</b>  | Chaperone protein HscA homolog                                | Cytoplasmic    | 2 | 2 | 2 | 2 | 1 |
| <b>VC0461</b>  | Pyridoxal phosphate homeostasis protein                       | Cytoplasmic    | 1 | 1 | 2 | 2 | 3 |
| <b>VC0445</b>  | Chaperone SurA                                                | Periplasmic    | 2 | 2 | 1 | 1 | 3 |
| <b>VCA0913</b> | Hemin ABC transporter, periplasmic hemin-binding protein HutB | Periplasmic    | 1 | 1 | 2 | 1 | 4 |
| <b>VCA0814</b> | Agmatinase                                                    | Cytoplasmic    | 0 | 0 | 5 | 1 | 3 |
| <b>VCA0712</b> | Pyrazinamidase/nicotinamidase                                 | Cytoplasmic    | 2 | 1 | 1 | 2 | 3 |
| <b>VCA0581</b> | Peptidase M48 domain-containing protein                       | Unknown        | 2 | 1 | 1 | 2 | 3 |
| <b>VC2568</b>  | Peptidyl-prolyl cis-trans isomerase                           | Cytoplasmic    | 2 | 2 | 1 | 0 | 4 |

|                |                                                                     |                |   |   |   |   |   |
|----------------|---------------------------------------------------------------------|----------------|---|---|---|---|---|
| <b>VC2413</b>  | Acetyltransferase component of pyruvate dehydrogenase complex       | Cytoplasmic    | 4 | 2 | 1 | 1 | 1 |
| <b>VC1703</b>  | Uncharacterized protein                                             | Unknown        | 3 | 0 | 1 | 1 | 4 |
| <b>VC1369</b>  | SsuA/THI5-like domain-containing protein                            | Inner Membrane | 3 | 1 | 0 | 0 | 5 |
| <b>VC0485</b>  | Pyruvate kinase                                                     | Cytoplasmic    | 3 | 0 | 2 | 1 | 3 |
| <b>VC0344</b>  | N-acetylmuramoyl-L-alanine amidase                                  | Unknown        | 2 | 2 | 2 | 1 | 2 |
| <b>VC2628</b>  | 3-dehydroquinate synthase                                           | Cytoplasmic    | 1 | 1 | 2 | 2 | 2 |
| <b>VC2472</b>  | tRNA-modifying protein YgfZ                                         | Unknown        | 5 | 1 | 0 | 0 | 2 |
| <b>VC2272</b>  | Transcriptional repressor NrdR                                      | Cytoplasmic    | 4 | 1 | 2 | 0 | 1 |
| <b>VC0179</b>  | Cyclic GMP-AMP synthase                                             | Cytoplasmic    | 2 | 0 | 1 | 1 | 4 |
| <b>VCA1016</b> | Lipoprotein                                                         | Unknown        | 1 | 2 | 2 | 1 | 2 |
| <b>VCA0558</b> | Gamma-glutamyltranspeptidase, putative                              | Periplasmic    | 4 | 0 | 0 | 1 | 3 |
| <b>VCA0459</b> | Lipoprotein                                                         | Unknown        | 1 | 1 | 3 | 1 | 2 |
| <b>VCA0346</b> | H-REV 107-related protein                                           | Unknown        | 2 | 1 | 2 | 1 | 2 |
| <b>VCA0059</b> | Major outer membrane lipoprotein Lpp                                | Outer Membrane | 4 | 0 | 1 | 1 | 2 |
| <b>VC2418</b>  | Thiol:disulfide interchange protein                                 | Periplasmic    | 2 | 1 | 1 | 1 | 3 |
| <b>VC2204</b>  | Negative regulator of flagellin synthesis                           | Unknown        | 3 | 3 | 0 | 1 | 1 |
| <b>VC2092</b>  | Citrate synthase                                                    | Cytoplasmic    | 1 | 0 | 1 | 5 | 1 |
| <b>VC2089</b>  | Succinate dehydrogenase flavoprotein subunit                        | Inner Membrane | 2 | 1 | 1 | 2 | 2 |
| <b>VC1089</b>  | Periplasmic binding protein-related protein                         | Periplasmic    | 1 | 0 | 2 | 2 | 3 |
| <b>VC0554</b>  | Protease, insulinase family/protease, insulinase family             | Unknown        | 2 | 2 | 0 | 1 | 3 |
| <b>VC0855</b>  | Chaperone protein DnaK                                              | Cytoplasmic    | 0 | 1 | 1 | 1 | 4 |
| <b>VC0837</b>  | Toxin coregulated pilus biosynthesis protein F                      | Unknown        | 2 | 1 | 2 | 1 | 1 |
| <b>VC0851</b>  | Outer membrane protein assembly factor BamE                         | Outer Membrane | 1 | 1 | 2 | 2 | 1 |
| <b>VCA0277</b> | Glycine cleavage system H protein                                   | Cytoplasmic    | 2 | 0 | 2 | 1 | 2 |
| <b>VC2736</b>  | 33 kDa chaperonin                                                   | Cytoplasmic    | 1 | 0 | 2 | 2 | 2 |
| <b>VC2579</b>  | 30S ribosomal protein S5                                            | Cytoplasmic    | 1 | 2 | 2 | 2 | 0 |
| <b>VC1297</b>  | Asparagine--tRNA ligase                                             | Cytoplasmic    | 3 | 0 | 1 | 0 | 3 |
| <b>VC0528</b>  | 2-C-methyl-D-erythritol 4-phosphate cytidyltransferase              | Cytoplasmic    | 1 | 0 | 2 | 3 | 1 |
| <b>VC0384</b>  | Sulfite reductase [NADPH] flavoprotein alpha-component              | Inner Membrane | 1 | 2 | 1 | 2 | 1 |
| <b>VCA1075</b> | PEGA domain-containing protein                                      | Unknown        | 0 | 0 | 1 | 1 | 5 |
| <b>VCA0880</b> | Uncharacterized protein                                             | Unknown        | 2 | 2 | 1 | 1 | 1 |
| <b>VCA0632</b> | MutT/nudix family protein                                           | Cytoplasmic    | 3 | 0 | 2 | 1 | 1 |
| <b>VCA0345</b> | DUF1349 domain-containing protein                                   | Unknown        | 1 | 2 | 2 | 1 | 1 |
| <b>VC2625</b>  | Ribulose-phosphate 3-epimerase                                      | Cytoplasmic    | 1 | 3 | 1 | 0 | 2 |
| <b>VC2456</b>  | Uncharacterized protein                                             | Outer Membrane | 1 | 0 | 2 | 2 | 2 |
| <b>VC2358</b>  | Hemerythrin-like domain-containing protein                          | Cytoplasmic    | 3 | 0 | 0 | 1 | 3 |
| <b>VC2004</b>  | Haem-binding uptake Tiki superfamily ChaN domain-containing protein | Unknown        | 2 | 1 | 1 | 1 | 2 |
| <b>VC1987</b>  | Outer membrane lipoprotein Slp, putative                            | Outer Membrane | 4 | 2 | 0 | 1 | 0 |
| <b>VC1745</b>  | Succinate-semialdehyde dehydrogenase                                | Cytoplasmic    | 0 | 1 | 1 | 3 | 2 |
| <b>VC0373</b>  | YjbQ family protein                                                 | Unknown        | 2 | 1 | 1 | 2 | 1 |
| <b>VC0103</b>  | Uncharacterized protein                                             | Cytoplasmic    | 3 | 2 | 0 | 1 | 1 |
| <b>VC0078</b>  | Ferritin                                                            | Cytoplasmic    | 2 | 2 | 1 | 2 | 0 |
| <b>VC0026</b>  | Zinc-binding alcohol dehydrogenase                                  | Cytoplasmic    | 2 | 1 | 2 | 1 | 1 |
| <b>VC0017</b>  | Uncharacterized protein                                             | Unknown        | 4 | 0 | 1 | 2 | 0 |
| <b>VC0545</b>  | Alanine--tRNA ligase                                                | Cytoplasmic    | 0 | 2 | 0 | 1 | 3 |
| <b>VCA0580</b> | Putative esterase VC_A0580                                          | Unknown        | 1 | 2 | 1 | 1 | 1 |
| <b>VC2587</b>  | 30S ribosomal protein S17                                           | Cytoplasmic    | 1 | 1 | 2 | 2 | 0 |



|                |                                                                    |                |   |   |   |   |   |
|----------------|--------------------------------------------------------------------|----------------|---|---|---|---|---|
| <b>VC2342</b>  | Elongation factor G 2                                              | Cytoplasmic    | 0 | 1 | 2 | 3 | 0 |
| <b>VC2260</b>  | 30S ribosomal protein S2                                           | Cytoplasmic    | 1 | 0 | 0 | 3 | 2 |
| <b>VC2156</b>  | Outer membrane protein assembly factor BamC                        | Outer Membrane | 5 | 0 | 0 | 0 | 1 |
| <b>VC1738</b>  | Enoyl-[acyl-carrier-protein] reductase [NADH] 1                    | Cytoplasmic    | 1 | 0 | 1 | 1 | 3 |
| <b>VC0570</b>  | 50S ribosomal protein L13                                          | Cytoplasmic    | 1 | 1 | 2 | 2 | 0 |
| <b>VCA0415</b> | VOC domain-containing protein                                      | Unknown        | 1 | 1 | 0 | 1 | 3 |
| <b>VC2527</b>  | Lipopolysaccharide export system protein LptA                      | Unknown        | 3 | 0 | 1 | 1 | 1 |
| <b>VC2362</b>  | Threonine synthase                                                 | Cytoplasmic    | 1 | 1 | 1 | 2 | 1 |
| <b>VC2196</b>  | Flagellar basal-body rod protein FlgF                              | Periplasmic    | 0 | 0 | 0 | 2 | 4 |
| <b>VC2081</b>  | High-affinity zinc uptake system protein ZnuA                      | Periplasmic    | 1 | 1 | 2 | 0 | 2 |
| <b>VC1938</b>  | Thioesterase                                                       | Cytoplasmic    | 1 | 2 | 1 | 1 | 1 |
| <b>VC0942</b>  | Lipoprotein                                                        | Unknown        | 3 | 3 | 0 | 0 | 0 |
| <b>VC0911</b>  | Trehalose-6-phosphate hydrolase                                    | Cytoplasmic    | 0 | 1 | 1 | 0 | 4 |
| <b>VC2106</b>  | Ferric uptake regulation protein                                   | Cytoplasmic    | 1 | 2 | 0 | 1 | 1 |
| <b>VCA0907</b> | Heme oxygenase HutZ                                                | Cytoplasmic    | 3 | 0 | 0 | 1 | 1 |
| <b>VC2458</b>  | Pyridoxine 5'-phosphate synthase                                   | Cytoplasmic    | 1 | 0 | 1 | 1 | 2 |
| <b>VC2236</b>  | Hydroxyacylglutathione hydrolase                                   | Cytoplasmic    | 0 | 1 | 0 | 2 | 2 |
| <b>VC2025</b>  | 50S ribosomal protein L32                                          | Cytoplasmic    | 3 | 0 | 1 | 1 | 0 |
| <b>VC1727</b>  | Glucose-1-phosphate adenylyltransferase 1                          | Cytoplasmic    | 1 | 0 | 1 | 2 | 1 |
| <b>VC1692</b>  | Trimethylamine-N-oxide reductase                                   | Periplasmic    | 0 | 0 | 2 | 2 | 1 |
| <b>VC1508</b>  | UPF0234 protein VC_1508                                            | Cytoplasmic    | 2 | 0 | 1 | 1 | 1 |
| <b>VC1345</b>  | Putative dioxygenase VC_1345                                       | Cytoplasmic    | 1 | 0 | 1 | 3 | 0 |
| <b>VC0692</b>  | Beta-hexosaminidase                                                | Cytoplasmic    | 2 | 0 | 1 | 0 | 2 |
| <b>VC0052</b>  | N5-carboxyaminoimidazole ribonucleotide mutase                     | Unknown        | 1 | 0 | 1 | 1 | 2 |
| <b>VCA1035</b> | Uncharacterized protein                                            | Unknown        | 1 | 0 | 2 | 1 | 1 |
| <b>VCA0958</b> | HTH cro/C1-type domain-containing protein                          | Cytoplasmic    | 1 | 0 | 1 | 1 | 2 |
| <b>VCA0726</b> | Molybdenum ABC transporter, periplasmic molybdenum-binding protein | Periplasmic    | 2 | 2 | 0 | 0 | 1 |
| <b>VCA0139</b> | DUF3316 domain-containing protein                                  | Unknown        | 1 | 0 | 0 | 2 | 2 |
| <b>VC2747</b>  | DUF4124 domain-containing protein                                  | Unknown        | 1 | 1 | 2 | 0 | 1 |
| <b>VC2022</b>  | Malonyl CoA-acyl carrier protein transacylase                      | Cytoplasmic    | 1 | 0 | 1 | 1 | 2 |
| <b>VC1893</b>  | Aminoglycoside phosphotransferase domain-containing protein        | Cytoplasmic    | 1 | 0 | 2 | 1 | 1 |
| <b>VC2720</b>  | Fe/S biogenesis protein NfuA                                       | Cytoplasmic    | 0 | 2 | 1 | 1 | 0 |
| <b>VC2586</b>  | 50S ribosomal protein L14                                          | Cytoplasmic    | 0 | 1 | 1 | 2 | 0 |
| <b>VC2273</b>  | Gamma-glutamyl phosphate reductase                                 | Unknown        | 1 | 2 | 0 | 1 | 0 |
| <b>VC2140</b>  | Flagellar hook-associated protein 2                                | Extracellular  | 2 | 1 | 1 | 0 | 0 |
| <b>VC0986</b>  | Adenylate kinase                                                   | Cytoplasmic    | 1 | 0 | 1 | 1 | 1 |
| <b>VC0329</b>  | DNA-directed RNA polymerase subunit beta'                          | Cytoplasmic    | 0 | 1 | 1 | 0 | 2 |
| <b>VC0219</b>  | 50S ribosomal protein L33                                          | Cytoplasmic    | 0 | 0 | 1 | 3 | 0 |
| <b>VCA0033</b> | Transcriptional initiation protein Tat                             | Unknown        | 1 | 2 | 0 | 1 | 0 |
| <b>VC2455</b>  | Phosphate ABC transporter substrate-binding protein                | Inner Membrane | 1 | 0 | 0 | 0 | 3 |
| <b>VC2435</b>  | ADP-ribose pyrophosphatase                                         | Cytoplasmic    | 2 | 0 | 1 | 0 | 1 |
| <b>VC2195</b>  | Flagellar basal-body rod protein FlgG                              | Extracellular  | 1 | 0 | 1 | 1 | 1 |
| <b>VC1496</b>  | Tail-specific protease                                             | Inner Membrane | 1 | 0 | 0 | 0 | 3 |
| <b>VC1043</b>  | Long-chain fatty acid transport protein                            | Outer Membrane | 0 | 2 | 0 | 1 | 1 |
| <b>VC0910</b>  | PTS system, trehalose-specific IIBC component                      | Inner Membrane | 2 | 1 | 0 | 1 | 0 |
| <b>VC0841</b>  | Accessory colonization factor AcfC                                 | Unknown        | 2 | 1 | 0 | 0 | 1 |
| <b>VC0550</b>  | Oxaloacetate decarboxylase, alpha subunit                          | Cytoplasmic    | 1 | 1 | 0 | 0 | 2 |

|                |                                                                |                |   |   |   |   |   |
|----------------|----------------------------------------------------------------|----------------|---|---|---|---|---|
| <b>VCA0123</b> | Type VI secretion system spike protein VgrG3                   | Cytoplasmic    | 0 | 2 | 1 | 0 | 0 |
| <b>VC2596</b>  | 50S ribosomal protein L3                                       | Cytoplasmic    | 0 | 1 | 1 | 1 | 0 |
| <b>VC2492</b>  | 3-isopropylmalate dehydratase large subunit                    | Cytoplasmic    | 0 | 0 | 1 | 0 | 2 |
| <b>VC0941</b>  | Serine hydroxymethyltransferase 1                              | Cytoplasmic    | 0 | 1 | 0 | 1 | 1 |
| <b>VC0487</b>  | Glutamine--fructose-6-phosphate aminotransferase [isomerizing] | Cytoplasmic    | 0 | 0 | 0 | 1 | 2 |
| <b>VC0397</b>  | Single-stranded DNA-binding protein                            | Cytoplasmic    | 0 | 0 | 0 | 2 | 1 |
| <b>VCA0722</b> | Uncharacterized protein                                        | Unknown        | 0 | 1 | 0 | 1 | 1 |
| <b>VCA0563</b> | NAD(P) transhydrogenase subunit alpha                          | Inner Membrane | 1 | 0 | 1 | 0 | 1 |
| <b>VC2684</b>  | Bifunctional aspartokinase/homoserine dehydrogenase            | Cytoplasmic    | 0 | 0 | 0 | 1 | 2 |
| <b>VC2420</b>  | Flavodoxin                                                     | Unknown        | 1 | 0 | 2 | 0 | 0 |
| <b>VC2414</b>  | Pyruvate dehydrogenase E1 component                            | Cytoplasmic    | 0 | 1 | 0 | 2 | 0 |
| <b>VC2280</b>  | Putative ATP-dependent zinc protease domain-containing protein | Cytoplasmic    | 1 | 2 | 0 | 0 | 0 |
| <b>VC2084</b>  | Succinate--CoA ligase [ADP-forming] subunit alpha              | Cytoplasmic    | 2 | 0 | 0 | 1 | 0 |
| <b>VC2013</b>  | PTS system glucose-specific EIICB component                    | Inner Membrane | 2 | 1 | 0 | 0 | 0 |
| <b>VC1964</b>  | Tim44-like domain-containing protein                           | Inner Membrane | 1 | 0 | 0 | 0 | 2 |
| <b>VC1601</b>  | Uncharacterized protein                                        | Inner Membrane | 1 | 0 | 0 | 0 | 2 |
| <b>VC1267</b>  | DUF1513 domain-containing protein                              | Inner Membrane | 1 | 0 | 0 | 1 | 1 |
| <b>VC1207</b>  | DUF3187 family protein                                         | Outer Membrane | 2 | 0 | 0 | 0 | 1 |
| <b>VC0200</b>  | Iron(III) compound receptor                                    | Outer Membrane | 0 | 0 | 1 | 1 | 1 |
| <b>VC0041</b>  | DUF3157 domain-containing protein                              | Unknown        | 0 | 0 | 1 | 1 | 1 |
| <b>VCA0740</b> | UPF0502 protein VC_A0740                                       | Cytoplasmic    | 1 | 1 | 0 | 0 | 0 |
| <b>VC2583</b>  | 30S ribosomal protein S14                                      | Cytoplasmic    | 0 | 1 | 1 | 0 | 0 |
| <b>VC2581</b>  | 50S ribosomal protein L6                                       | Cytoplasmic    | 1 | 0 | 1 | 0 | 0 |
| <b>VC2463</b>  | Elongation factor 4                                            | Inner Membrane | 1 | 1 | 0 | 0 | 0 |
| <b>VC2249</b>  | 3-hydroxyacyl-[acyl-carrier-protein] dehydratase FabZ          | Cytoplasmic    | 1 | 1 | 0 | 0 | 0 |
| <b>VC0468</b>  | Glutathione synthetase                                         | Cytoplasmic    | 0 | 0 | 0 | 1 | 1 |
| <b>VCA1054</b> | NAD(P)-binding domain-containing protein                       | Unknown        | 1 | 0 | 1 | 0 | 0 |
| <b>VCA1027</b> | Maltose operon periplasmic protein, putative                   | Periplasmic    | 0 | 0 | 0 | 1 | 1 |
| <b>VCA0212</b> | Sugar ABC transporter ATPase                                   | Cytoplasmic    | 1 | 0 | 0 | 0 | 1 |
| <b>VCA0125</b> | DUF3012 domain-containing protein                              | Unknown        | 0 | 0 | 0 | 1 | 1 |
| <b>VC2744</b>  | 50S ribosomal subunit assembly factor BipA                     | Inner Membrane | 1 | 0 | 0 | 0 | 1 |
| <b>VC2341</b>  | Long-chain-fatty-acid--CoA ligase, putative                    | Cytoplasmic    | 1 | 0 | 0 | 1 | 0 |
| <b>VC1896</b>  | Uncharacterized protein                                        | Inner Membrane | 1 | 1 | 0 | 0 | 0 |
| <b>VC1776</b>  | N-acetylneuraminate lyase, putative                            | Cytoplasmic    | 1 | 1 | 0 | 0 | 0 |
| <b>VC1555</b>  | YhcH/YjgK/YiaL family protein                                  | Cytoplasmic    | 0 | 0 | 1 | 0 | 1 |
| <b>VC1249</b>  | Glycine cleavage system transcriptional repressor              | Inner Membrane | 0 | 0 | 1 | 1 | 0 |
| <b>VC1031</b>  | Inosine monophosphate dehydrogenase-related protein            | Unknown        | 1 | 0 | 0 | 1 | 0 |
| <b>VC0457</b>  | DUF4426 domain-containing protein                              | Unknown        | 0 | 0 | 0 | 1 | 1 |
| <b>VC0392</b>  | Aminotransferase, class V                                      | Cytoplasmic    | 1 | 0 | 0 | 1 | 0 |
