# Supplementary material for: Outer membrane vesicles and the outer membrane protein OmpU govern Vibrio cholerae biofilm matrix assembly
Source: PubMed Central journal article supplement (PMC10865864; doi:10.1128/mbio.03304-23), 2024-01-11
Supplement: mbio.03304-23-s0003.pdf [file mbio.03304-23-s0003.pdf]

**Supplementary Table 2. List of all proteins identified in OMV proteome**

| Label   | Description                                                  | PsortB         | Total spectral counts |      |      |      |      |
|---------|--------------------------------------------------------------|----------------|-----------------------|------|------|------|------|
|         |                                                              |                | O1                    | O2   | O3   | O4   | O5   |
| VC0633  | Outer membrane protein U                                     | Outer Membrane | 2874                  | 4464 | 5255 | 4865 | 6261 |
| VC1888  | Hemolysin-related protein                                    | Extracellular  | 1659                  | 916  | 846  | 698  | 703  |
| VC2211  | Vibriobactin receptor                                        | Outer Membrane | 232                   | 446  | 879  | 821  | 1470 |
| VC1854  | Porin, putative                                              | Outer Membrane | 398                   | 663  | 761  | 881  | 983  |
| VCA0738 | Conjugal transfer protein TraF                               | Unknown        | 419                   | 484  | 740  | 772  | 847  |
| VC0930  | Hemolysin-related protein                                    | Extracellular  | 894                   | 484  | 468  | 375  | 342  |
| VC0475  | Iron-regulated outer membrane virulence protein              | Outer Membrane | 161                   | 407  | 382  | 381  | 984  |
| VC1154  | Uncharacterized protein                                      | Unknown        | 134                   | 278  | 434  | 518  | 875  |
| VCA1028 | Maltoporin                                                   | Outer Membrane | 150                   | 272  | 443  | 518  | 729  |
| VCA0223 | Pre-pro-metalloprotease PrtV                                 | Extracellular  | 487                   | 219  | 441  | 416  | 334  |
| VC1894  | Penicillin-binding protein activator LpoB                    | Unknown        | 61                    | 182  | 267  | 317  | 698  |
| VC1318  | Outer membrane protein OmpV                                  | Outer Membrane | 92                    | 206  | 359  | 439  | 420  |
| VCA0568 | Conjugal transfer protein TraF                               | Outer Membrane | 191                   | 154  | 314  | 336  | 369  |
| VCA0576 | Heme transport protein HutA                                  | Outer Membrane | 112                   | 371  | 161  | 242  | 409  |
| VC2213  | Outer membrane protein OmpA                                  | Outer Membrane | 65                    | 290  | 208  | 248  | 460  |
| VCA0865 | Hemagglutinin/proteinase                                     | Extracellular  | 317                   | 100  | 251  | 235  | 183  |
| VCA0863 | Lysophospholipase VolA                                       | Unknown        | 98                    | 155  | 218  | 227  | 310  |
| VC0156  | Vitamin B12 transporter BtuB                                 | Outer Membrane | 62                    | 165  | 191  | 202  | 287  |
| VC1485  | DUF3466 family protein                                       | Unknown        | 88                    | 128  | 174  | 168  | 255  |
| VC1384  | Outer membrane protein beta-barrel domain-containing protein | Unknown        | 71                    | 97   | 152  | 146  | 160  |
| VC2305  | Outer membrane protein OmpK                                  | Outer Membrane | 50                    | 80   | 102  | 131  | 260  |
| VC2174  | 5'-nucleotidase                                              | Periplasmic    | 47                    | 206  | 73   | 65   | 226  |
| VC0972  | Porin, putative                                              | Outer Membrane | 57                    | 101  | 115  | 102  | 225  |
| VC2252  | Outer membrane protein assembly factor BamA                  | Outer Membrane | 38                    | 75   | 87   | 106  | 172  |
| VC1836  | Tol-Pal system protein TolB                                  | Periplasmic    | 28                    | 96   | 77   | 90   | 171  |
| VC2436  | Outer membrane protein TolC                                  | Outer Membrane | 35                    | 94   | 47   | 88   | 191  |
| VC1621  | Agglutination protein                                        | Outer Membrane | 22                    | 115  | 40   | 60   | 177  |
| VC0446  | LPS-assembly protein LptD                                    | Outer Membrane | 32                    | 94   | 84   | 79   | 112  |
| VC0146  | Ribosomal RNA small subunit methyltransferase D              | Cytoplasmic    | 46                    | 54   | 105  | 119  | 69   |
| VCA0867 | Outer membrane protein W                                     | Outer Membrane | 10                    | 45   | 60   | 92   | 153  |
| VC0381  | Uncharacterized protein                                      | Unknown        | 29                    | 43   | 63   | 73   | 147  |
| VC0935  | Capsular polysaccharide synthesis enzyme CpsB                | Outer Membrane | 26                    | 58   | 67   | 77   | 125  |
| VC2002  | DUF2860 domain-containing protein                            | Outer Membrane | 49                    | 46   | 74   | 74   | 89   |
| VCA0625 | TonB receptor-related protein                                | Outer Membrane | 23                    | 48   | 65   | 63   | 121  |
| VC2011  | OMP_b-brl domain-containing protein                          | Inner Membrane | 16                    | 48   | 43   | 71   | 110  |
| VC1329  | Opacity protein-related protein                              | Outer Membrane | 24                    | 39   | 52   | 61   | 100  |
| VC0200  | Iron(III) compound receptor                                  | Outer Membrane | 16                    | 49   | 55   | 53   | 78   |
| VCA0813 | Aminopeptidase                                               | Extracellular  | 122                   | 13   | 32   | 23   | 19   |
| VC1867  | Lipid A deacylase LpxR family protein                        | Unknown        | 23                    | 40   | 34   | 39   | 69   |
| VCA0862 | Long-chain fatty acid transport protein                      | Outer Membrane | 22                    | 47   | 38   | 37   | 60   |
| VC1895  | DUF1425 domain-containing protein                            | Unknown        | 23                    | 40   | 38   | 29   | 69   |
| VC2298  | Lipoprotein, putative                                        | Unknown        | 1                     | 36   | 24   | 37   | 87   |
| VCA0734 | OMP_b-brl domain-containing protein                          | Unknown        | 16                    | 29   | 43   | 36   | 60   |
| VCA0594 | Hemolysin                                                    | Unknown        | 2                     | 32   | 31   | 47   | 71   |

|                |                                                                               |                |    |    |    |    |    |
|----------------|-------------------------------------------------------------------------------|----------------|----|----|----|----|----|
| <b>VC2456</b>  | Uncharacterized protein                                                       | Outer Membrane | 24 | 32 | 35 | 34 | 56 |
| <b>VC0942</b>  | Lipoprotein                                                                   | Unknown        | 1  | 46 | 40 | 46 | 48 |
| <b>VC1362</b>  | Amino acid ABC transporter, periplasmic amino acid-binding protein            | Periplasmic    | 14 | 48 | 42 | 29 | 45 |
| <b>VC1091</b>  | Oligopeptide ABC transporter, periplasmic oligopeptide-binding protein        | Periplasmic    | 2  | 56 | 24 | 19 | 72 |
| <b>VC1835</b>  | Peptidoglycan-associated lipoprotein                                          | Outer Membrane | 8  | 23 | 19 | 21 | 52 |
| <b>VC1207</b>  | DUF3187 family protein                                                        | Outer Membrane | 16 | 26 | 22 | 28 | 28 |
| <b>VC0171</b>  | Peptide ABC transporter, periplasmic peptide-binding protein                  | Periplasmic    | 11 | 16 | 20 | 36 | 37 |
| <b>VC2142</b>  | Flagellin B                                                                   | Extracellular  | 0  | 25 | 16 | 25 | 48 |
| <b>VC1042</b>  | Long-chain fatty acid transport protein                                       | Outer Membrane | 7  | 18 | 27 | 25 | 30 |
| <b>VC0928</b>  | RbmA protein                                                                  | Unknown        | 35 | 63 | 4  | 5  | 0  |
| <b>VC2197</b>  | Flagellar hook protein FlgE                                                   | Extracellular  | 2  | 25 | 10 | 13 | 56 |
| <b>VC2168</b>  | DUF2066 domain-containing protein                                             | Unknown        | 0  | 17 | 7  | 16 | 66 |
| <b>VCA0812</b> | Leucine aminopeptidase-related protein                                        | Extracellular  | 11 | 12 | 34 | 17 | 25 |
| <b>VC0581</b>  | Penicillin-binding protein activator LpoA                                     | Inner Membrane | 1  | 28 | 8  | 7  | 51 |
| <b>VC0608</b>  | Iron(III) ABC transporter, periplasmic iron-compound-binding protein          | Periplasmic    | 1  | 12 | 12 | 13 | 57 |
| <b>VCA0559</b> | Solitary outer membrane autotransporter beta-barrel domain-containing protein | Unknown        | 9  | 15 | 21 | 27 | 21 |
| <b>VCA0064</b> | TonB system receptor, putative                                                | Outer Membrane | 12 | 15 | 23 | 10 | 30 |
| <b>VC0954</b>  | LPS-assembly lipoprotein LptE                                                 | Outer Membrane | 4  | 19 | 22 | 16 | 26 |
| <b>VC2187</b>  | Flagellin C                                                                   | Extracellular  | 0  | 15 | 9  | 13 | 49 |
| <b>VCA0975</b> | endopeptidase La                                                              | Cytoplasmic    | 32 | 15 | 18 | 12 | 7  |
| <b>VC2143</b>  | Flagellin D                                                                   | Extracellular  | 3  | 12 | 16 | 12 | 38 |
| <b>VC0755</b>  | Peptidase B                                                                   | Cytoplasmic    | 18 | 36 | 6  | 9  | 6  |
| <b>VC1043</b>  | Long-chain fatty acid transport protein                                       | Outer Membrane | 9  | 18 | 13 | 13 | 21 |
| <b>VC1703</b>  | Uncharacterized protein                                                       | Unknown        | 0  | 19 | 9  | 17 | 24 |
| <b>VC1064</b>  | Lipoprotein-related protein                                                   | Unknown        | 1  | 13 | 8  | 8  | 31 |
| <b>VCA0877</b> | Hydrolase, putative                                                           | Unknown        | 4  | 13 | 15 | 21 | 7  |
| <b>VC2188</b>  | Flagellin A                                                                   | Extracellular  | 0  | 8  | 7  | 10 | 32 |
| <b>VCA0573</b> | DamX-related protein                                                          | Periplasmic    | 1  | 18 | 5  | 13 | 15 |
| <b>VC2299</b>  | Peptidyl-prolyl cis-trans isomerase                                           | Periplasmic    | 5  | 10 | 10 | 13 | 14 |
| <b>VC1987</b>  | Outer membrane lipoprotein Slp, putative                                      | Outer Membrane | 1  | 14 | 5  | 11 | 19 |
| <b>VC2156</b>  | Outer membrane protein assembly factor BamC                                   | Outer Membrane | 0  | 13 | 2  | 4  | 30 |
| <b>VC1663</b>  | Heat shock protein HslJ                                                       | Unknown        | 0  | 10 | 1  | 0  | 38 |
| <b>VC1200</b>  | Trypsin, putative                                                             | Unknown        | 0  | 2  | 13 | 9  | 25 |
| <b>VC2198</b>  | Basal-body rod modification protein FlgD                                      | Extracellular  | 0  | 6  | 2  | 6  | 32 |
| <b>VCA0219</b> | Hemolysin                                                                     | Extracellular  | 20 | 1  | 14 | 7  | 0  |
| <b>VC2141</b>  | Protein FlaG                                                                  | Unknown        | 1  | 13 | 5  | 9  | 12 |
| <b>VC2204</b>  | Negative regulator of flagellin synthesis                                     | Unknown        | 0  | 8  | 4  | 9  | 19 |
| <b>VC0402</b>  | MSHA biogenesis protein MshL                                                  | Outer Membrane | 6  | 10 | 5  | 6  | 13 |
| <b>VC1896</b>  | Uncharacterized protein                                                       | Inner Membrane | 1  | 10 | 11 | 4  | 11 |
| <b>VC0578</b>  | Hemolysin, putative                                                           | Periplasmic    | 0  | 6  | 7  | 13 | 10 |
| <b>VC0554</b>  | Protease, insulinase family/protease, insulinase family                       | Unknown        | 0  | 9  | 5  | 8  | 14 |
| <b>VC2200</b>  | Flagellar basal body rod protein FlgB                                         | Periplasmic    | 0  | 6  | 4  | 9  | 16 |
| <b>VC0844</b>  | Accessory colonization factor AcfA                                            | Outer Membrane | 3  | 7  | 7  | 6  | 11 |
| <b>VC0762</b>  | Outer membrane protein assembly factor BamB                                   | Outer Membrane | 0  | 21 | 1  | 2  | 9  |
| <b>VCA1027</b> | Maltose operon periplasmic protein, putative                                  | Periplasmic    | 0  | 7  | 3  | 5  | 18 |

|                |                                                                      |                |   |    |    |    |    |
|----------------|----------------------------------------------------------------------|----------------|---|----|----|----|----|
| <b>VC2251</b>  | Chaperone protein Skp                                                | Periplasmic    | 0 | 10 | 3  | 9  | 9  |
| <b>VC2196</b>  | Flagellar basal-body rod protein FlgF                                | Periplasmic    | 0 | 6  | 4  | 7  | 13 |
| <b>VC1496</b>  | Tail-specific protease                                               | Inner Membrane | 0 | 8  | 4  | 6  | 12 |
| <b>VC2764</b>  | ATP synthase subunit beta                                            | Cytoplasmic    | 4 | 9  | 10 | 4  | 2  |
| <b>VC0905</b>  | Probable D-methionine-binding lipoprotein MetQ                       | Inner Membrane | 3 | 17 | 4  | 3  | 2  |
| <b>VC2128</b>  | Flagellar hook-length control protein FliK, putative                 | Extracellular  | 0 | 8  | 5  | 7  | 9  |
| <b>VC1195</b>  | Lipoprotein, putative                                                | Outer Membrane | 0 | 4  | 1  | 2  | 21 |
| <b>VCA0581</b> | Peptidase M48 domain-containing protein                              | Unknown        | 0 | 12 | 1  | 2  | 12 |
| <b>VC1606</b>  | Outer membrane protein TolC                                          | Unknown        | 2 | 9  | 3  | 7  | 6  |
| <b>VC1425</b>  | Putrescine-binding periplasmic protein                               | Periplasmic    | 0 | 12 | 4  | 1  | 10 |
| <b>VC0533</b>  | Lipoprotein NlpD                                                     | Outer Membrane | 0 | 4  | 2  | 5  | 15 |
| <b>VCA0981</b> | Solute-binding protein family 3/N-terminal domain-containing protein | Unknown        | 4 | 1  | 5  | 14 | 1  |
| <b>VC2550</b>  | YtfJ family protein                                                  | Inner Membrane | 2 | 6  | 5  | 5  | 6  |
| <b>VC1887</b>  | Peptidoglycan-binding protein CsiV                                   | Unknown        | 0 | 7  | 6  | 3  | 7  |
| <b>VC1622</b>  | Outer membrane protein, putative                                     | Outer Membrane | 0 | 6  | 6  | 4  | 7  |
| <b>VC2455</b>  | Phosphate ABC transporter substrate-binding protein                  | Inner Membrane | 0 | 7  | 2  | 2  | 10 |
| <b>VC0132</b>  | Uncharacterized protein                                              | Unknown        | 0 | 4  | 2  | 6  | 9  |
| <b>VCA0195</b> | OMP_b-brl domain-containing protein                                  | Outer Membrane | 0 | 11 | 2  | 2  | 5  |
| <b>VC1834</b>  | Cell division coordinator CpoB                                       | Unknown        | 0 | 3  | 1  | 2  | 14 |
| <b>VC0430</b>  | Immunogenic protein                                                  | Unknown        | 0 | 3  | 2  | 3  | 12 |
| <b>VC0274</b>  | DUF1481 domain-containing protein                                    | Unknown        | 0 | 7  | 2  | 3  | 8  |
| <b>VCA0037</b> | Copper chaperone PCu(A)C                                             | Unknown        | 1 | 3  | 6  | 6  | 3  |
| <b>VC1929</b>  | C4-dicarboxylate-binding periplasmic protein DctP                    | Periplasmic    | 0 | 3  | 0  | 0  | 15 |
| <b>VCA0759</b> | Arginine ABC transporter, periplasmic arginine-binding protein       | Periplasmic    | 0 | 10 | 2  | 2  | 4  |
| <b>VCA0459</b> | Lipoprotein                                                          | Unknown        | 0 | 5  | 1  | 3  | 9  |
| <b>VC2527</b>  | Lipopolysaccharide export system protein LptA                        | Unknown        | 0 | 7  | 1  | 2  | 8  |
| <b>VC0157</b>  | Alkaline serine protease                                             | Extracellular  | 8 | 4  | 3  | 1  | 2  |
| <b>VC2144</b>  | Flagellin E                                                          | Extracellular  | 0 | 3  | 3  | 4  | 7  |
| <b>VC2140</b>  | Flagellar hook-associated protein 2                                  | Extracellular  | 0 | 5  | 1  | 5  | 5  |
| <b>VC0708</b>  | Outer membrane protein assembly factor BamD                          | Outer Membrane | 0 | 6  | 1  | 2  | 7  |
| <b>VC2378</b>  | DUF1499 domain-containing protein                                    | Unknown        | 1 | 2  | 4  | 1  | 8  |
| <b>VC1334</b>  | Tricarboxylic transport TctC                                         | Periplasmic    | 0 | 4  | 2  | 2  | 8  |
| <b>VCA0058</b> | LysM domain-containing protein                                       | Unknown        | 0 | 5  | 1  | 2  | 7  |
| <b>VC1267</b>  | DUF1513 domain-containing protein                                    | Inner Membrane | 1 | 2  | 3  | 2  | 7  |
| <b>VC0688</b>  | DUF2799 domain-containing protein                                    | Unknown        | 0 | 1  | 1  | 2  | 11 |
| <b>VC0362</b>  | Elongation factor Tu-B                                               | Cytoplasmic    | 1 | 8  | 2  | 1  | 2  |
| <b>VC0409</b>  | MSHA pilin protein MshA                                              | Unknown        | 1 | 2  | 1  | 1  | 9  |
| <b>VCA0106</b> | Sel1 repeat family protein                                           | Cytoplasmic    | 0 | 4  | 2  | 3  | 4  |
| <b>VC2662</b>  | PhaC PHA synthase                                                    | Unknown        | 0 | 6  | 1  | 1  | 5  |
| <b>VC0973</b>  | VvgS protein                                                         | Unknown        | 0 | 6  | 0  | 2  | 5  |
| <b>VC2249</b>  | 3-hydroxyacyl-[acyl-carrier-protein] dehydratase FabZ                | Cytoplasmic    | 0 | 5  | 1  | 2  | 4  |
| <b>VC0414</b>  | DUF6701 domain-containing protein                                    | Unknown        | 0 | 4  | 7  | 0  | 1  |
| <b>VCA1008</b> | Outer membrane protein, putative                                     | Outer Membrane | 0 | 1  | 3  | 5  | 2  |
| <b>VC2199</b>  | Flagellar basal-body rod protein FlgC                                | Periplasmic    | 0 | 1  | 1  | 3  | 6  |
| <b>VC0194</b>  | Glutathione hydrolase proenzyme                                      | Periplasmic    | 0 | 1  | 1  | 1  | 8  |
| <b>VC0480</b>  | Small-conductance mechanosensitive channel                           | Inner Membrane | 1 | 9  | 0  | 0  | 0  |
| <b>VC2195</b>  | Flagellar basal-body rod protein FlgG                                | Extracellular  | 0 | 2  | 2  | 2  | 3  |

|                |                                                                      |                |   |   |   |   |   |
|----------------|----------------------------------------------------------------------|----------------|---|---|---|---|---|
| <b>VC1424</b>  | Putrescine-binding periplasmic protein                               | Periplasmic    | 0 | 5 | 1 | 1 | 2 |
| <b>VC2664</b>  | Chaperonin GroEL 1                                                   | Cytoplasmic    | 0 | 6 | 0 | 0 | 2 |
| <b>VC0432</b>  | Malate dehydrogenase                                                 | Unknown        | 0 | 2 | 2 | 1 | 3 |
| <b>VC0648</b>  | Lipoprotein Nlpl                                                     | Inner Membrane | 0 | 2 | 1 | 1 | 4 |
| <b>VCA0317</b> | Outer membrane lipoprotein Blc                                       | Outer Membrane | 0 | 1 | 1 | 1 | 4 |
| <b>VC1560</b>  | Catalase-peroxidase                                                  | Cytoplasmic    | 0 | 5 | 1 | 0 | 1 |
| <b>VC0328</b>  | DNA-directed RNA polymerase subunit beta                             | Cytoplasmic    | 2 | 4 | 1 | 0 | 0 |
| <b>VCA0685</b> | Iron(III) ABC transporter, periplasmic iron-compound-binding protein | Periplasmic    | 1 | 1 | 2 | 1 | 2 |
| <b>VCA0514</b> | Putative ATP-dependent zinc protease domain-containing protein       | Unknown        | 0 | 5 | 1 | 1 | 0 |
| <b>VC2191</b>  | Flagellar hook-associated protein 1                                  | Extracellular  | 0 | 2 | 0 | 2 | 3 |
| <b>VC0450</b>  | Membrane-bound lytic murein transglycosylase C                       | Cytoplasmic    | 0 | 3 | 1 | 1 | 2 |
| <b>VC0851</b>  | Outer membrane protein assembly factor BamE                          | Outer Membrane | 0 | 1 | 0 | 2 | 3 |
| <b>VC0341</b>  | Oligoribonuclease                                                    | Cytoplasmic    | 0 | 1 | 1 | 1 | 3 |
| <b>VCA0139</b> | DUF3316 domain-containing protein                                    | Unknown        | 0 | 5 | 0 | 0 | 1 |
| <b>VCA0059</b> | Major outer membrane lipoprotein Lpp                                 | Outer Membrane | 0 | 2 | 0 | 0 | 4 |
| <b>VC2190</b>  | Flagellar hook-associated protein FlgL                               | Extracellular  | 0 | 2 | 1 | 0 | 3 |
| <b>VC1101</b>  | Uncharacterized protein                                              | Unknown        | 0 | 2 | 0 | 1 | 3 |
| <b>VC1107</b>  | Outer-membrane lipoprotein carrier protein                           | Periplasmic    | 0 | 1 | 1 | 1 | 2 |
| <b>VC2181</b>  | Outer-membrane lipoprotein LoLB                                      | Unknown        | 0 | 4 | 0 | 0 | 1 |
| <b>VC1585</b>  | Catalase                                                             | Periplasmic    | 0 | 3 | 1 | 0 | 1 |
| <b>VC0361</b>  | Elongation factor G 1                                                | Cytoplasmic    | 1 | 1 | 1 | 2 | 0 |
| <b>VCA0552</b> | Fatty acid cis/trans isomerase                                       | Unknown        | 0 | 1 | 0 | 1 | 3 |
| <b>VCA0227</b> | Iron(III) ABC transporter, periplasmic iron-compound-binding protein | Periplasmic    | 0 | 2 | 0 | 0 | 3 |
| <b>VC2562</b>  | 2',3'-cyclic-nucleotide 2'-phosphodiesterase                         | Periplasmic    | 0 | 1 | 1 | 1 | 2 |
| <b>VC1638</b>  | DNA-binding response regulator                                       | Cytoplasmic    | 0 | 0 | 0 | 2 | 3 |
| <b>VC0964</b>  | PTS system, glucose-specific IIA component                           | Cytoplasmic    | 0 | 0 | 2 | 0 | 3 |
| <b>VC2733</b>  | Secretin GspD                                                        | Outer Membrane | 0 | 2 | 1 | 1 | 0 |
| <b>VC0948</b>  | Endolytic peptidoglycan transglycosylase RlpA                        | Unknown        | 0 | 1 | 0 | 3 | 0 |
| <b>VC0394</b>  | UvrABC system protein A                                              | Cytoplasmic    | 0 | 3 | 0 | 0 | 1 |
| <b>VCA0722</b> | Uncharacterized protein                                              | Unknown        | 0 | 0 | 2 | 1 | 1 |
| <b>VCA0113</b> | Type VI secretion system lipoprotein TssJ                            | Unknown        | 0 | 2 | 0 | 2 | 0 |
| <b>VC2517</b>  | Phospholipid-binding protein MlaC                                    | Unknown        | 0 | 2 | 0 | 0 | 2 |
| <b>VC2341</b>  | Long-chain-fatty-acid--CoA ligase, putative                          | Cytoplasmic    | 0 | 3 | 1 | 0 | 0 |
| <b>VC1583</b>  | Superoxide dismutase [Cu-Zn]                                         | Periplasmic    | 0 | 0 | 1 | 1 | 2 |
| <b>VC1266</b>  | Imelysin-like domain-containing protein                              | Unknown        | 0 | 1 | 0 | 0 | 3 |
| <b>VC0976</b>  | Protein QmcA                                                         | Unknown        | 0 | 1 | 0 | 0 | 3 |
| <b>VCA0539</b> | UPF0312 protein VC_A0539                                             | Unknown        | 0 | 2 | 0 | 0 | 1 |
| <b>VCA0197</b> | GMP reductase                                                        | Cytoplasmic    | 1 | 1 | 0 | 0 | 1 |
| <b>VC2164</b>  | Putative beta-barrel assembly-enhancing protease                     | Unknown        | 0 | 1 | 0 | 0 | 2 |
| <b>VCA0900</b> | Metallo-beta-lactamase domain-containing protein                     | Unknown        | 0 | 2 | 0 | 0 | 1 |
| <b>VCA0829</b> | Acetyl-CoA synthase                                                  | Cytoplasmic    | 0 | 2 | 0 | 1 | 0 |
| <b>VCA0563</b> | NAD(P) transhydrogenase subunit alpha                                | Inner Membrane | 1 | 2 | 0 | 0 | 0 |
| <b>VCA0125</b> | DUF3012 domain-containing protein                                    | Unknown        | 0 | 0 | 2 | 0 | 1 |
| <b>VC2084</b>  | Succinate--CoA ligase [ADP-forming] subunit alpha                    | Cytoplasmic    | 0 | 2 | 0 | 0 | 1 |
| <b>VC1872</b>  | PrkA AAA domain-containing protein                                   | Cytoplasmic    | 1 | 2 | 0 | 0 | 0 |

|               |                                                                              |                |   |   |   |   |   |
|---------------|------------------------------------------------------------------------------|----------------|---|---|---|---|---|
| <b>VC1863</b> | Amino acid ABC transporter, periplasmic amino acid-binding protein           | Periplasmic    | 0 | 2 | 0 | 1 | 0 |
| <b>VC1492</b> | glutamate dehydrogenase                                                      | Cytoplasmic    | 0 | 0 | 2 | 0 | 1 |
| <b>VC1325</b> | Autoinducer 2-binding periplasmic protein LuxP                               | Periplasmic    | 0 | 1 | 0 | 0 | 2 |
| <b>VC1162</b> | Putative ATP-dependent zinc protease domain-containing protein               | Cytoplasmic    | 0 | 1 | 0 | 0 | 2 |
| <b>VC2574</b> | 30S ribosomal protein S13                                                    | Cytoplasmic    | 0 | 1 | 1 | 0 | 0 |
| <b>VC2350</b> | Deoxyribose-phosphate aldolase                                               | Cytoplasmic    | 0 | 0 | 1 | 1 | 0 |
| <b>VC0445</b> | Chaperone SurA                                                               | Periplasmic    | 0 | 1 | 0 | 0 | 1 |
| <b>VC2744</b> | 50S ribosomal subunit assembly factor BipA                                   | Inner Membrane | 1 | 1 | 0 | 0 | 0 |
| <b>VC2004</b> | Haem-binding uptake Tiki superfamily ChaN domain-containing protein          | Unknown        | 1 | 1 | 0 | 0 | 0 |
| <b>VC1952</b> | Chitinase                                                                    | Extracellular  | 0 | 0 | 1 | 0 | 1 |
| <b>VC1950</b> | trimethylamine-N-oxide reductase                                             | Periplasmic    | 0 | 0 | 1 | 0 | 1 |
| <b>VC1755</b> | ABC-type transport auxiliary lipoprotein component domain-containing protein | Unknown        | 0 | 1 | 0 | 0 | 1 |
| <b>VC0174</b> | SPOR domain-containing protein                                               | Periplasmic    | 0 | 1 | 0 | 1 | 0 |
