# Supplementary material for: Outer membrane vesicles and the outer membrane protein OmpU govern Vibrio cholerae biofilm matrix assembly
Source: PubMed Central journal article supplement (PMC10865864; doi:10.1128/mbio.03304-23), 2024-01-11
Supplement: mbio.03304-23-s0004.pdf [file mbio.03304-23-s0004.pdf]

**Supplementary Table 3. Proteins, significantly up- and down-regulated in *ΔompU* compared to rugose strain.**

| Gene                                                         | Description                                                                        | Fold change (log2) |
|--------------------------------------------------------------|------------------------------------------------------------------------------------|--------------------|
| <b>Proteins significantly up-regulated in <i>ΔompU</i></b>   |                                                                                    |                    |
| VC_2662                                                      | Hypothetical protein                                                               | 2.543              |
| VC_A0713                                                     | Hypothetical protein                                                               | 2.3357             |
| VC_2213                                                      | Outer membrane protein A precursor                                                 | 2.3031             |
| VC_2216                                                      | CopG protein                                                                       | 1.9661             |
| VC_A0139                                                     | Acyl-CoA synthetase                                                                | 1.8961             |
| VC_A0707                                                     | Phosphoglycerate transporter protein PgtP                                          | 1.6996             |
| VC_1318                                                      | Outer membrane protein OmpV                                                        | 1.6253             |
| VC_0935                                                      | Capsular polysaccharide synthesis enzyme VpsM                                      | 1.5661             |
| VC_0972                                                      | Chitin outer membrane porin                                                        | 1.5632             |
| VC_1854                                                      | Outer membrane protein OmpT                                                        | 1.5583             |
| VC_0437                                                      | GTP-binding protein Obg                                                            | 1.4761             |
| VC_2002                                                      | Hypothetical protein                                                               | 1.4356             |
| VC_0475                                                      | TonB-dependent receptor                                                            | 1.3718             |
| VC_0157                                                      | Alkaline serine exoprotease A precursor, IvaP                                      | 1.3707             |
| VC_0486                                                      | Transcriptional regulator of glmS gene, DeoR family                                | 1.3545             |
| VC_1834                                                      | Cell division coordinator CpoB                                                     | 1.2497             |
| VC_0487                                                      | Glutamine—fructose-6-phosphate aminotransferase                                    | 1.206              |
| VC_0296                                                      | Biotin carboxyl carrier protein of acetyl-CoA carboxylase                          | 1.1966             |
| VC_0156                                                      | Outer membrane vitamin B12 receptor BtuB                                           | 1.1852             |
| VC_1835                                                      | Tol-Pal system peptidoglycan-associated lipoprotein PAL                            | 1.1596             |
| VC_1965                                                      | Transcriptional regulator, AcrR family                                             | 1.1362             |
| VC_1966                                                      | Lysophospholipid transporter LplT/2-acylglycerophosphoethanolamine acyltransferase | 1.0881             |
| VC_A0952                                                     | Transcriptional regulator, VpsT                                                    | 1.058              |
| VC_A0962                                                     | Hypothetical protein                                                               | 1.0405             |
| VC_A0223                                                     | Metalloprotease, putative zinc-binding domain, PrtV                                | 1.0144             |
| VC_A0568                                                     | TraF-related protein                                                               | 1.0129             |
| VC_1895                                                      | YcfL protein: an OM lipoprotein that is part of a salvage cluster                  | 1.0072             |
| <b>Proteins significantly down-regulated in <i>ΔompU</i></b> |                                                                                    |                    |
| VC_0633                                                      | Outer membrane porin, OmpU                                                         | -4.8762            |
| VC_0911                                                      | Trehalose-6-phosphate hydrolase                                                    | -1.4309            |
| VC_2240                                                      | Phenolic acid decarboxylase                                                        | -1.4162            |
| VC_A0551                                                     | Hypothetical protein                                                               | -1.3288            |
| VC_0566                                                      | Outer membrane stress sensor protein DegQ, serine protease                         | -1.2519            |
| VC_A0935                                                     | Hypothetical protein                                                               | -1.2307            |
| VC_0034                                                      | Periplasmic thiol:disulfide interchange protein DsbA                               | -1.2149            |
| VC_1611                                                      | Homoserine O-succinyltransferase                                                   | -1.0731            |
| VC_A0032                                                     | Hypothetical protein                                                               | -1.0356            |
