# Supplementary material for: Outer membrane vesicles and the outer membrane protein OmpU govern Vibrio cholerae biofilm matrix assembly
Source: PubMed Central journal article supplement (PMC10865864; doi:10.1128/mbio.03304-23), 2024-01-11
Supplement: mbio.03304-23-s0005.pdf [file mbio.03304-23-s0005.pdf]

**Supplementary Table 4. Strains and plasmid list**

| Strain or plasmid                  | Relevant genotype                                                                                                                               | Source           |
|------------------------------------|-------------------------------------------------------------------------------------------------------------------------------------------------|------------------|
| <b><i>E. coli</i> strains</b>      |                                                                                                                                                 |                  |
| DH5- $\alpha$ $\lambda$ <i>pir</i> | F' <i>endA1 hsdR17 supE44 thi-1 recA1 gyrA96 relA1</i> $\Delta$ ( <i>argF-lacZYA</i> )<br>U169( $\Phi$ 80 <i>lacDM15</i> ) $\lambda$ <i>pir</i> | BCCM Gene corner |
| CC118 $\lambda$ <i>pir</i>         | $\Delta$ ( <i>ara-leu</i> ) <i>araD</i> $\Delta$ <i>lacX74 galE galK phoA20 thi-1 rpsE rpoB argE(Am) recA1</i><br>$\lambda$ <i>pir</i>          | (1)              |
| S17-1 $\lambda$ <i>pir</i>         | Tp <sup>r</sup> Sm <sup>r</sup> <i>recA thi pro rK<sup>-</sup> mK<sup>+</sup> RP4::2-Tc::MuKm Tn7</i> $\lambda$ <i>pir</i>                      | (2)              |
| <b><i>V. cholerae</i> strains</b>  |                                                                                                                                                 |                  |
| FY_Vc_2                            | <i>Vibrio cholerae</i> O1 El Tor A1552, Rugose variant, Rif <sup>r</sup>                                                                        | (3)              |
| FY_Vc_7044                         | FY_Vc_2 $\Delta$ <i>rbmA</i> (VC0928)                                                                                                           | This work        |
| FY_Vc_686                          | FY_Vc_2 $\Delta$ <i>rbmC</i> (VC0930)                                                                                                           | (4)              |
| FY_Vc_1367                         | FY_Vc_2 $\Delta$ <i>bap1</i> (VC1888)                                                                                                           | (4)              |
| FY_Vc_4329                         | FY_Vc_2 $\Delta$ <i>rbmA</i> $\Delta$ <i>rbmC</i> $\Delta$ <i>bap1</i>                                                                          | (5)              |
| FY_Vc_4327                         | FY_Vc_2 $\Delta$ <i>vpvps-I</i> $\Delta$ <i>vpvps-II</i>                                                                                        | (6)              |
| FY_Vc_9251                         | FY_Vc_2 $\Delta$ <i>toxR</i>                                                                                                                    | This work        |
| FY_Vc_17473                        | FY_Vc_9251 pMMB67.EH- <i>ompU</i>                                                                                                               | This work        |
| FY_Vc_13387                        | FY_Vc_2 $\Delta$ <i>ompU</i> (VC0633)                                                                                                           | This work        |
| FY_Vc_16739                        | FY_Vc_2 $\Delta$ <i>ompT</i> (VC1854)                                                                                                           | This work        |
| FY_Vc_13385                        | FY_Vc_2 $\Delta$ <i>ompA</i> (VC2213)                                                                                                           | This work        |
| FY_Vc_16843                        | FY_Vc_2 $\Delta$ <i>ompV</i> (VC1318)                                                                                                           | This work        |
| FY_Vc_13724                        | FY_Vc_13387 Tn7:: <i>Pnat-ompU</i>                                                                                                              | This work        |
| FY_Vc_240                          | FY_Vc_2 Tn7-GFP                                                                                                                                 | (7)              |
| FY_Vc_16827                        | FY_Vc_4327 $\Delta$ <i>ompU</i>                                                                                                                 | This work        |
| FY_Vc_16821                        | FY_Vc_7044 $\Delta$ <i>ompU</i>                                                                                                                 | This work        |
| FY_Vc_17026                        | FY_Vc_686 $\Delta$ <i>ompU</i>                                                                                                                  | This work        |
| FY_Vc_17028                        | FY_Vc_1367 $\Delta$ <i>ompU</i>                                                                                                                 | This work        |
| FY_Vc_16823                        | FY_Vc_4329 $\Delta$ <i>ompU</i>                                                                                                                 | This work        |
| FY_Vc_8970                         | $\Delta$ <i>ctxAB</i> $\Delta$ <i>rbmA</i> $\Delta$ <i>rbmC</i> <i>bap1</i> -3xHA                                                               | This work        |
| FY_Vc_8966                         | $\Delta$ <i>ctxAB</i> $\Delta$ <i>rbmA</i> $\Delta$ <i>bap1</i> <i>rbmC</i> -3xFLAG                                                             | This work        |
| FY_Vc_9441                         | $\Delta$ <i>ctxAB</i> $\Delta$ <i>rbmC</i> $\Delta$ <i>bap1</i> <i>rbmA</i> -Myc                                                                | This work        |
| FY_Vc_17245                        | FY_Vc_13387 $\Delta$ VC2662                                                                                                                     | This work        |
| FY_Vc_17262                        | FY_Vc_13387 $\Delta$ VCA0713                                                                                                                    | This work        |
| FY_Vc_9944                         | FY_Vc_2 $\Delta$ <i>degP</i> (VC0566)                                                                                                           | This work        |
| FY_Vc_6228                         | FY_Vc_4329 Tn7-GFP                                                                                                                              | This work        |
| FY_Vc_6226                         | FY_Vc_4327 Tn7-GFP                                                                                                                              | (6)              |
| FY_Vc_10559                        | $\Delta$ <i>ctxAB</i> $\Delta$ <i>rbmA</i> $\Delta$ <i>rbmC</i> $\Delta$ <i>bap1</i> $\Delta$ <i>vpvps-I</i> $\Delta$ <i>vpvps-II</i>           | This work        |
| <b>Plasmids</b>                    |                                                                                                                                                 |                  |
| pGP704- <i>sacB28</i>              | pGP704 derivative, <i>mob/oriT sacB</i> , Amp <sup>r</sup>                                                                                      | G. Schoolnik     |
| pFY_1277                           | pGP704- <i>sacB28::</i> $\Delta$ <i>rbmA</i> , Amp <sup>r</sup>                                                                                 | This work        |
| pFY_5536                           | pGP704- <i>sacB28::</i> $\Delta$ <i>ompU</i> , Amp <sup>r</sup>                                                                                 | This work        |
| pFY_5542                           | pGP704- <i>sacB28::</i> $\Delta$ <i>ompT</i> , Amp <sup>r</sup>                                                                                 | This work        |
| pFY_5535                           | pGP704- <i>sacB28::</i> $\Delta$ <i>ompA</i> , Amp <sup>r</sup>                                                                                 | This work        |

|                         |                                                                                          |                            |
|-------------------------|------------------------------------------------------------------------------------------|----------------------------|
| pFY_5654                | pGP704- <i>sacB28::ΔompV</i> , Amp <sup>r</sup>                                          | This work                  |
| pFY_4306                | pGP704- <i>sacB28::ΔtoxR</i> , Amp <sup>r</sup>                                          | This work                  |
| pFY_4832                | pGP704- <i>sacB28::ΔVC2662</i> , Amp <sup>r</sup>                                        | This work                  |
| pFY_6949                | pGP704- <i>sacB28::ΔVCA0713</i> , Amp <sup>r</sup>                                       | This work                  |
| pFY_295                 | pGP704- <i>sacB28::ΔctxAB</i> , Amp <sup>r</sup>                                         | (5)                        |
| pFY_1057                | pGP704- <i>sacB28::rbmA-Myc</i> , Amp <sup>r</sup>                                       | (5)                        |
| pFY_1093                | pGP704- <i>sacB28::rbmC-3xFLAG</i> , Amp <sup>r</sup>                                    | (5)                        |
| pFY_1159                | pGP704- <i>sacB28::bap1-3xHA</i> , Amp <sup>r</sup>                                      | (5)                        |
| pFY_1303<br>(pMMB67.EH) | Expression vector harboring <i>lacI</i> and containing a Ptac promoter, Amp <sup>r</sup> | (8)                        |
| pFY_7013                | pMMB67.EH- <i>ompU</i> , Amp <sup>r</sup>                                                | This work                  |
| pMCM11                  | pGP704:: <i>mTn7-gfp</i> , Gm <sup>r</sup> Amp <sup>r</sup>                              | M. Miller and G. Schoolnik |
| pFY_720                 | pGP704-Tn7, Gm <sup>r</sup> Amp <sup>r</sup>                                             | (9)                        |
| pFY_5722                | pGP704-Tn7:: <i>ompU</i>                                                                 | This work                  |

## REFERENCES

1. Herrero M, de Lorenzo V, Timmis KN. 1990. Transposon vectors containing non-antibiotic resistance selection markers for cloning and stable chromosomal insertion of foreign genes in gram-negative bacteria. *J Bacteriol* 172:6557-67.
2. de Lorenzo V, Timmis KN. 1994. Analysis and construction of stable phenotypes in gram-negative bacteria with Tn5- and Tn10-derived minitransposons. *Methods Enzymol* 235:386-405.
3. Yildiz FH, Schoolnik GK. 1999. *Vibrio cholerae* O1 El Tor: identification of a gene cluster required for the rugose colony type, exopolysaccharide production, chlorine resistance, and biofilm formation. *Proc Natl Acad Sci U S A* 96:4028-33.
4. Fong JC, Yildiz FH. 2007. The *rbmBCDEF* gene cluster modulates development of rugose colony morphology and biofilm formation in *Vibrio cholerae*. *J Bacteriol* 189:2319-30.
5. Berk V, Fong JC, Dempsey GT, Develioglu ON, Zhuang X, Liphardt J, Yildiz FH, Chu S. 2012. Molecular architecture and assembly principles of *Vibrio cholerae* biofilms. *Science* 337:236-9.
6. Fong JCN, Syed KA, Klose KE, Yildiz FH. 2010. Role of *Vibrio* polysaccharide (*vps*) genes in VPS production, biofilm formation and *Vibrio cholerae* pathogenesis. *Microbiology (Reading)* 156:2757-2769.
7. Beyhan S, Yildiz FH. 2007. Smooth to rugose phase variation in *Vibrio cholerae* can be mediated by a single nucleotide change that targets c-di-GMP signalling pathway. *Mol Microbiol* 63:995-1007.
8. Furste JP, Pansegrau W, Frank R, Blocker H, Scholz P, Bagdasarian M, Lanka E. 1986. Molecular cloning of the plasmid RP4 primase region in a multi-host-range *tacP* expression vector. *Gene* 48:119-31.
9. Lim B, Beyhan S, Meir J, Yildiz FH. 2006. Cyclic-diGMP signal transduction systems in *Vibrio cholerae*: modulation of rugosity and biofilm formation. *Mol Microbiol* 60:331-48.
